# Supplementary material for: Non-targeted metabolomics of moldy wheat by ultra-performance liquid chromatography – quadrupole time-of-flight mass spectrometry
Source: Front Microbiol. 2023 Apr 6;14:1136516. doi: 10.3389/fmicb.2023.1136516 (PMC10119584; doi:10.3389/fmicb.2023.1136516)
Supplement: Supplementary file 1 [file Table_1.XLSX]

## Sheet: mycotoxin_out
Non-targeted metabolomics of moldy wheat by ultra-performance liquid chromatography – quadrupole time-of-flight mass spectrometry
Boyan Gao, Weiying Lu, Mengchu Jin, Yumei Chen
Supporting Information
Table S1. Tentative identification of mycotoxin markers.
ID	Compound name	Chemical Formula	Exact mass	Smiles	InChIKey	Calculated m/z	Experimental m/z	Mass error (ppm)	PLS1_loading	Adduct	Retention time (min)
1	Kojic acid	C6H6O4	142.027	C1=C(OC=C(C1=O)O)CO	BEJNERDRQOWKJM-UHFFFAOYSA-N	143.034	143.034	0.0446842	0.852928	H	1.3508
2	Fusarinolic acid	C10H13NO3	195.09	CC(CCC1=CN=C(C=C1)C(=O)O)O	GYQWAMYDGNUNNL-UHFFFAOYSA-N	218.081	218.079	7.24211	1.89442	Na	2.72323
3	Cordycepin	C10H13N5O3	251.102	C1[C@H](O[C@H]([C@@H]1O)N2C=NC3=C(N=CN=C32)N)CO	OFEZSBMBBKLLBJ-BAJZRUMYSA-N	252.11	252.11	0.16722	1.62432	H	1.5149
4	T2-Tetraol	C15H22O6	298.142	CC1=C[C@@H]2[C@](C[C@@H]1O)([C@]3([C@@H]([C@H]([C@H](C34CO4)O2)O)O)C)CO	ZAXZBJSXSOISTF-ZSTBYQRGSA-N	316.176	316.176	0.933036	1.8442	NH4	4.47498
5	Aspinonene	C9H16O4	188.105	C[C@H]1[C@@H](O1)[C@](CO)(/C=C/[C@H](C)O)O	ZXCYAEKEHIEQHD-SVQZIREZSA-N	189.113	189.113	0.0612476	0.854412	H	6.62632
6	Ergine	C16H17N3O	267.137	CN1C[C@@H](C=C2[C@H]1CC3=CNC4=CC=CC2=C34)C(=O)N	GENAHGKEFJLNJB-QMTHXVAHSA-N	285.171	285.171	0.991788	-0.368359	NH4	2.9016
7	Paspalic acid	C16H16N2O2	268.121	CN1CC(=C[C@H]2[C@H]1CC3=CNC4=CC=CC2=C34)C(=O)O	RJNCJTROKRDRBW-TZMCWYRMSA-N	286.155	286.155	0.013716	1.31181	NH4	3.53127
8	Ustiloxin D	C23H34N4O8	494.238	CC[C@@]1([C@H](NC(=O)[C@@H](NC(=O)[C@H]([C@@H](C2=CC(=C(C=C2)O)O1)O)NC)C(C)C)C(=O)NCC(=O)O)C	GDXLZSYACWZHOC-ZNRYNLAGSA-N	512.269	512.272	5.66356	2.06644	NH4	2.38735
9	Nigragillin	C13H22N2O	222.173	C/C=C/C=C/C(=O)N1C[C@@H](N(C[C@H]1C)C)C	DVCNHRTYSUTLOS-OJRXFFSMSA-N	223.181	223.181	0.238697	1.23682	H	2.45148
10	Elymoclavine	C16H18N2O	254.142	CN1CC(=C[C@H]2[C@H]1CC3=CNC4=CC=CC2=C34)CO	DAVNRFCJMIONPO-UKRRQHHQSA-N	255.15	255.15	0.109324	1.10677	H	2.78735
11	Lysergol	C16H18N2O	254.142	CN1C[C@@H](C=C2[C@H]1CC3=CNC4=CC=CC2=C34)CO	BIXJFIJYBLJTMK-MEBBXXQBSA-N	255.15	255.15	0.109324	1.10677	H	2.78735
12	Ergometrinine	C19H23N3O2	325.179	C[C@@H](CO)NC(=O)[C@@H]1CN([C@@H]2CC3=CNC4=CC=CC(=C34)C2=C1)C	WVVSZNPYNCNODU-PLQHRBFRSA-N	326.187	326.187	0.93191	0.936286	H	1.6579
13	Phomalactone	C8H10O3	154.063	C/C=C/[C@H]1[C@H](C=CC(=O)O1)O	OKDRUMBNXIYUEO-VHJVCUAWSA-N	177.053	177.053	3.41114	-1.7129	Na	1.71307
14	Terrein	C8H10O3	154.063	C/C=C/C1=CC(=O)[C@@H]([C@H]1O)O	MHOOPNKRBMHHEC-HZIBQTDNSA-N	177.053	177.053	3.41114	-1.7129	Na	1.71307
15	Asperlactone	C9H12O4	184.074	C[C@H]1[C@@H](O1)C2=C[C@@H](OC2=O)[C@H](C)O	VMLNPJDEXLLCQG-DGCAKLBHSA-N	207.064	207.063	3.99283	1.88079	Na	2.15902
16	Herquline A	C19H26N2O2	314.199	CN1C[C@@H]2C[C@H]3CCC(=O)[C@H]4[C@H]3N2C[C@H]1CC5=C[C@H]4C(=O)CC5	UFKNDVKQCSBIQE-MBOQCRCKSA-N	337.19	337.189	1.07009	1.17244	Na	1.85058
17	Chanoclavin	C16H21N2O+	257.165	C/C(=C\[C@H]1[C@@H](CC2=CNC3=CC=CC1=C23)[NH2+]C)/CO	SAHHMCVYMGARBT-HEESEWQSSA-O	280.156	280.155	2.82852	1.37658	Na	1.7435
18	Anisomycin	C14H19NO4	265.131	CC(=O)O[C@@H]1[C@H](CN[C@@H]1CC2=CC=C(C=C2)OC)O	YKJYKKNCCRKFSL-RDBSUJKOSA-N	283.168	283.166	8.05778	1.50978	NH4	2.11577
19	Rugulovasine A	C16H16N2O2	268.121	CC1=C[C@@]2([C@H](CC3=CNC4=CC=CC2=C34)NC)OC1=O	QTWQJTORJVFWAQ-XJKSGUPXSA-N	286.155	286.155	0.013716	1.31181	NH4	3.53127
20	Ergometrine	C19H23N3O2	325.179	C[C@@H](CO)NC(=O)[C@H]1CN([C@@H]2CC3=CNC4=CC=CC(=C34)C2=C1)C	WVVSZNPYNCNODU-XTQGRXLLSA-N	326.187	326.187	0.93191	0.936286	H	1.6579
21	cyclo(L-Pro-L-Tyr)	C14H16N2O3	260.116	C1C[C@H]2C(=O)N[C@H](C(=O)N2C1)CC3=CC=C(C=C3)O	LSGOTAXPWMCUCK-RYUDHWBXSA-N	261.125	261.124	2.4156	0.748126	H	2.62278
22	cyclo(L-Pro-L-Val)	C10H16N2O2	196.121	CC(C)[C@H]1C(=O)N2CCC[C@H]2C(=O)N1	XLUAWXQORJEMBD-YUMQZZPRSA-N	219.112	219.111	5.35433	1.76975	Na	1.97218
23	Aspergillimide	C20H29N3O3	359.221	C[C@H]1CCN2C13C[C@@H]4[C@](C2)(C[C@@]5(C4(C)C)CC(=O)N(C5=O)C)N(C3=O)C	RTNMRJRMTGSUAE-UXVBPGSQSA-N	360.229	360.229	0.00653072	1.93005	H	4.88193
24	Aspyrone	C9H12O4	184.074	C[C@@H]1[C@H](C=C(C(=O)O1)[C@H]2[C@@H](O2)C)O	RCAULRNMJFUWRP-HETMPLHPSA-N	207.064	207.063	3.99283	1.88079	Na	2.15902
25	Agroclavine	C16H18N2	238.147	CC1=C[C@H]2[C@@H](CC3=CNC4=CC=CC2=C34)N(C1)C	XJOOMMHNYOJWCZ-UKRRQHHQSA-N	239.155	239.155	0.073731	1.06702	H	1.98643
26	Festuclavine	C16H20N2	240.163	C[C@@H]1C[C@H]2[C@@H](CC3=CNC4=CC=CC2=C34)N(C1)C	VLMZMRDOMOGGFA-WDBKCZKBSA-N	241.17	241.17	0.0172721	1.24362	H	2.1945
27	Tetracycline	C22H24N2O8	444.153	C[C@@]1([C@H]2C[C@H]3[C@@H](C(=O)C(=C([C@]3(C(=O)C2=C(C4=C1C=CC=C4O)O)O)O)C(=O)N)N(C)C)O	NWXMGUDVXFXRIG-WESIUVDSSA-N	462.188	462.188	0.797424	2.00144	NH4	2.43
28	Chlamydospordiol	C11H16O5	228.1	CC(C1=C(C(=CC(=O)O1)OC)CO)C(C)O	BSXCHPRMOOSCRM-UHFFFAOYSA-N	246.134	246.134	0.362372	0.971881	NH4	2.0945
29	Spiramycin	C43H74N2O14	842.514	C[C@@H]1C/C=C/C=C/[C@@H]([C@@H](C[C@@H]([C@@H]([C@H]([C@@H](CC(=O)O1)O)OC)OC2C(C(C(C(O2)C)OC3CC(C(C(O3)C)O)(C)O)N(C)C)O)CC=O)C)OC4CCC(C(O4)C)N(C)C	ACTOXUHEUCPTEW-JMRHEKERSA-N	860.55	860.548	1.62496	0.831361	NH4	9.52168
30	Agistatin D	C11H14O4	210.089	CC[C@@H]1CC=C2[C@@]([C@@H]1O)(C(=O)C=CO2)O	JNJNTFPIOCKSTA-AVPPRXQKSA-N	233.08	233.079	4.1589	0.784995	Na	2.06582
31	Methysergide	C21H27N3O2	353.21	CC[C@@H](CO)NC(=O)[C@H]1CN([C@@H]2CC3=CN(C4=CC=CC(=C34)C2=C1)C)C	KPJZHOPZRAFDTN-ZRGWGRIASA-N	354.218	354.218	0.0238429	1.04576	H	4.72473
32	NT-2 Toxin	C17H24O7	340.152	CC1=C[C@@H]2[C@](C[C@@H]1O)([C@]3([C@@H]([C@H]([C@H]([C@@]34CO4)O2)O)OC(=O)C)C)CO	CSYVMZMEBKUDRQ-BNWDXEGFSA-N	341.161	341.16	2.65963	1.38764	H	1.72212
33	Penicillic acid	C8H10O4	170.058	CC(=C)C(=O)/C(=C/C(=O)O)/OC	VOUGEZYPVGAPBB-XQRVVYSFSA-N	193.048	193.048	1.84847	1.96205	Na	2.75153
34	Mitomycin	C15H18N4O5	334.128	CC1=C(C(=O)C2=C(C1=O)N3C[C@H]4[C@@H]([C@@]3([C@@H]2COC(=O)N)OC)N4)N	NWIBSHFKIJFRCO-WUDYKRTCSA-N	352.165	352.162	9.21941	1.58419	NH4	4.51758
35	Neosolaniol	C19H26O8	382.163	CC1=C[C@@H]2[C@](C[C@@H]1O)([C@]3([C@@H]([C@H]([C@H]([C@@]34CO4)O2)O)OC(=O)C)C)COC(=O)C	TVZHDVCTOCZDNE-WVJYZQHISA-N	383.171	383.171	0.0866703	1.32504	H	2.44443
36	cyclo(L-Leu-L-Pro)	C11H18N2O2	210.137	CC(C)C[C@H]1C(=O)N2CCC[C@H]2C(=O)N1	SZJNCZMRZAUNQT-IUCAKERBSA-N	233.126	233.127	1.91243	1.38955	Na	2.06582
37	Puromycin	C22H29N7O5	471.223	CN(C)C1=NC=NC2=C1N=CN2[C@H]3[C@@H]([C@@H]([C@H](O3)CO)NC(=O)[C@H](CC4=CC=C(C=C4)OC)N)O	RXWNCPJZOCPEPQ-NVWDDTSBSA-N	472.231	472.231	0.0208401	1.14713	H	1.8505
38	7-Hydroxypestalotin	C11H18O5	230.115	CCC[C@H]([C@@H]([C@@H]1CC(=CC(=O)O1)OC)O)O	YLHOHANRUSKHKO-YWVKMMECSA-N	248.149	248.15	4.66667	1.59709	NH4	4.09633
39	Macrosphelide A	C16H22O8	342.131	C[C@H]1CC(=O)O[C@H]([C@@H](/C=C/C(=O)O[C@H]([C@@H](/C=C/C(=O)O1)O)C)O)C	MJMMUATWVTYSFD-FTXQSDARSA-N	360.166	360.166	1.22265	1.38764	NH4	1.74355
40	Trichodermamide C	C21H22N2O9	446.133	CN(C1=CC2=C(C(=C(C=C2)OC)OC)OC1=O)C(=O)C3=NO[C@H]4[C@@H](C=C[C@H]([C@]4(C3)O)O)O	PCMUPOUDXMFDRE-NYGSYELISA-N	464.167	464.167	0.302506	1.66959	NH4	1.01408
41	Chlamydosporol	C11H14O5	226.084	C[C@H]1C2=C(CO[C@]1(C)O)C(=CC(=O)O2)OC	HHOYYCAQWHQFFV-KGFZYKRKSA-N	227.092	227.092	0.582707	1.342	H	2.79442
42	Verrucarol	C15H22O4	266.152	CC1=C[C@@H]2[C@](CC1)([C@]3([C@@H](C[C@H]([C@@]34CO4)O2)O)C)CO	ZSRVBNXAPSQDFY-OJVARPOJSA-N	267.16	267.16	2.32849	1.35961	H	2.25863
43	Fumigaclavine C	C23H30N2O2	366.231	C[C@H]1CN([C@@H]2CC3=C(NC4=CC=CC(=C34)[C@H]2[C@H]1OC(=O)C)C(C)(C)C=C)C	OSICWVVWEXKSBD-LFAYTRTRSA-N	367.239	367.239	0.00068843	0.741245	H	3.45955
44	Verruculotoxin	C15H20N2O	244.158	C1CCN2C[C@@H](NC(=O)[C@@H]2C1)CC3=CC=CC=C3	CUANCTHYEDWUMU-KBPBESRZSA-N	267.149	267.147	7.43198	1.12606	Na	4.7321
45	Pyrenocin A	C11H12O4	208.074	C/C=C/C(=O)C1=C(OC(=O)C=C1OC)C	VVYCRPVWBIEKIW-SNAWJCMRSA-N	209.081	209.081	0.446732	1.11567	H	1.44367
46	Thiolutin	C8H8N2O2S2	228.003	CC(=O)NC1=C2C(=CSS2)N(C1=O)C	MHMRAFONCSQAIA-UHFFFAOYSA-N	246.038	246.037	2.69411	1.02673	NH4	1.96508
47	15-Acetyldeoxynivalenol	C17H22O7	338.137	CC1=C[C@@H]2[C@]([C@@H](C1=O)O)([C@]3(C[C@H]([C@H]([C@@]34CO4)O2)O)C)COC(=O)C	IDGRYIRJIFKTAN-HTJQZXIKSA-N	339.143	339.144	4.91066	1.08084	H	2.37298
48	3-Acetyldeoxynivalenol	C17H22O7	338.137	CC1=C[C@@H]2[C@]([C@@H](C1=O)O)([C@]3(C[C@H]([C@H]([C@@]34CO4)O2)OC(=O)C)C)CO	ADFIQZBYNGPCGY-HTJQZXIKSA-N	339.143	339.144	4.91066	1.08084	H	2.37298
49	Citromycetin	C14H10O7	290.043	CC1=CC(=O)C2=C(O1)C3=C(C=C(C(=C3C(=O)O)O)O)OC2	PKEPGKZPVDAVKI-UHFFFAOYSA-N	313.034	313.032	4.05042	0.953343	Na	2.27315
50	Cyclopenol	C17H14N2O4	310.095	CN1C(=O)C2=CC=CC=C2NC(=O)C13C(O3)C4=CC(=CC=C4)O	BDDNYDPRCCDQQJ-UHFFFAOYSA-N	328.129	328.13	2.02108	0.907428	NH4	1.68635
51	Aflatoxin M2	C17H14O7	330.074	COC1=C2C3=C(C(=O)CC3)C(=O)OC2=C4C(=C1)OC5C4(CCO5)O	OQLKWHFMUPJCJY-UHFFFAOYSA-N	348.108	348.108	0.0738541	1.03178	NH4	2.47305
52	Paraherquamide A	C28H35N3O5	493.258	C[C@]1(CCN2[C@]13C[C@@H]4[C@](C2)(C[C@@]5(C4(C)C)C6=C(C7=C(C=C6)OC(C=CO7)(C)C)NC5=O)N(C3=O)C)O	UVZZDDLIOJPDKX-ITKQZBBDSA-N	516.248	516.247	0.0691569	0.738257	Na	5.4969
53	Dihydroergosine	C30H39N5O5	549.295	CC(C)C[C@H]1C(=O)N2CCC[C@H]2[C@]3(N1C(=O)[C@](O3)(C)NC(=O)[C@@H]4CC5[C@@H](CC6=CNC7=CC=CC5=C67)N(C4)C)O	XWMMZDZUHSYSPU-VDPJHPGLSA-N	572.285	572.285	0.00186889	1.58419	Na	4.56757
54	Fusaric acid	C10H13NO2	179.095	CCCCC1=CN=C(C=C1)C(=O)O	DGMPVYSXXIOGJY-UHFFFAOYSA-N	202.085	202.084	3.42568	1.00436	Na	2.08743
55	Quinolactacin A	C16H18N2O2	270.137	CCC(C)C1C2=C(C(=O)C3=CC=CC=C3N2C)C(=O)N1	FLHQAMWKNPOTDV-UHFFFAOYSA-N	271.145	271.145	0.125461	1.35696	H	1.60083
56	Roquefortine D	C22H25N5O2	391.201	CC(C)(C=C)C12CC3C(=O)NC(C(=O)N3C1NC4=CC=CC=C24)CC5=CN=CN5	IQVNREJWRXOHEO-UHFFFAOYSA-N	409.233	409.235	4.88311	0.683561	NH4	2.52337
57	Ergosin	C30H37N5O5	547.279	CC(C)C[C@H]1C(=O)N2CCC[C@H]2[C@]3(N1C(=O)[C@](O3)(C)NC(=O)[C@H]4CN([C@@H]5CC6=CNC7=CC=CC(=C67)C5=C4)C)O	NESVMZOPWPCFAU-ZPRCMDFASA-N	570.269	570.269	0.00972132	0.692048	Na	4.08218
58	Pyrenophorol	C16H24O6	312.157	C[C@H]1OC(=O)/C=C/[C@H](CC[C@H](OC(=O)/C=C/[C@H](CC1)O)C)O	RBQNDQOKFICJGL-UTBFYLPBSA-N	313.168	313.165	9.12973	-1.31514	H	8.44045
59	Phomopsolide B	C15H20O6	296.126	C/C=C(\C)/C(=O)O[C@H]1C=CC(=O)O[C@H]1/C=C/[C@@H]([C@H](C)O)O	JTHHOHSDOJJNFN-HIWLEQICSA-N	314.161	314.16	2.16134	2.00296	NH4	2.88747
60	Clonostachydiol	C14H20O6	284.126	C[C@@H]1CC[C@H](/C=C/C(=O)O[C@@H]([C@H](/C=C/C(=O)O1)O)C)O	SSVNIYICRYPPEB-WHZDEVAFSA-N	307.116	307.116	1.09783	-1.22712	Na	2.13723
61	Monoacetoxyscirpenol	C17H24O6	324.157	CC1=CC2C(CC1)(C3(C(C(C(C34CO4)O2)O)O)C)COC(=O)C	IRXDUBNENLKYTC-UHFFFAOYSA-N	325.165	325.165	0.447439	0.660773	H	2.38023
62	Doxycyclin	C22H24N2O8	444.153	C[C@@H]1[C@H]2[C@@H]([C@H]3[C@@H](C(=O)C(=C([C@]3(C(=O)C2=C(C4=C1C=CC=C4O)O)O)O)C(=O)N)N(C)C)O	SGKRLCUYIXIAHR-AKNGSSGZSA-N	462.188	462.188	0.797424	2.00144	NH4	2.43
63	Oxaline	C24H25N5O4	447.191	CC(C)(C=C)[C@@]12C=C(C(=O)N\3[C@]1(NC(=O)/C3=C\C4=CN=CN4)N(C5=CC=CC=C25)OC)OC	SOHAVULMGIITDH-ZXPSTKSJSA-N	465.226	465.225	1.3696	-1.23235	NH4	4.31058
64	Ergotamine	C33H35N5O5	581.264	C[C@@]1(C(=O)N2[C@H](C(=O)N3CCC[C@H]3[C@@]2(O1)O)CC4=CC=CC=C4)NC(=O)[C@H]5CN([C@@H]6CC7=CNC8=CC=CC(=C78)C6=C5)C	XCGSFFUVFURLIX-VFGNJEKYSA-N	599.303	599.298	8.20873	1.81155	NH4	1.95788
65	Dihydroergotamine	C33H37N5O5	583.279	C[C@@]1(C(=O)N2[C@H](C(=O)N3CCC[C@H]3[C@@]2(O1)O)CC4=CC=CC=C4)NC(=O)[C@@H]5C[C@H]6[C@@H](CC7=CNC8=CC=CC6=C78)N(C5)C	LUZRJRNZXALNLM-JGRZULCMSA-N	584.285	584.287	3.05453	1.77408	H	3.98807
66	5-Hydroxyculmorin	C15H26O3	254.188	C[C@@]12CC[C@H](C([C@H]3[C@@H]1[C@@H](C[C@@]2(C3O)C)O)(C)C)O	XFKGEQRMYJCXFK-YTAGIEBCSA-N	277.18	277.178	5.5908	1.30149	Na	16.9919
67	Aflatoxin G2	C17H14O7	330.074	COC1=C2C3=C(C(=O)OCC3)C(=O)OC2=C4[C@@H]5CCO[C@@H]5OC4=C1	WPCVRWVBBXIRMA-WNWIJWBNSA-N	348.108	348.108	0.0738541	1.03178	NH4	2.47305
68	Ergocornine	C31H39N5O5	561.295	CC(C)[C@H]1C(=O)N2CCC[C@H]2[C@]3(N1C(=O)[C@](O3)(C(C)C)NC(=O)[C@H]4CN([C@@H]5CC6=CNC7=CC=CC(=C67)C5=C4)C)O	UJYGDMFEEDNVBF-OGGGUQDZSA-N	584.285	584.285	0.0782987	0.851234	Na	3.9598
69	Tryptophol	C10H11NO	161.084	C1=CC=C2C(=C1)C(=CN2)CCO	MBBOMCVGYCRMEA-UHFFFAOYSA-N	184.074	184.074	0.000296179	0.55681	Na	6.63931
70	Pseurotin D	C18H28O4	308.199	C[C@H]1CCC=C([C@H](C=C[C@@](C=CC(=O)O[C@@H]1C)(C)O)OC)C	BYWWNDLILWPPJP-JXSMBQFASA-N	309.206	309.207	0.244122	1.59622	H	9.4432
71	Marcfortine B	C27H33N3O4	463.247	CC1(C=COC2=C(O1)C=CC3=C2NC(=O)[C@@]34C[C@@]56CN7CCCC[C@]7(C[C@H]5C4(C)C)C(=O)N6)C	SGIZPBSMKAKPSO-QKHVDVHYSA-N	486.237	486.237	0.252678	1.13292	Na	2.08027
72	Marcfortine A	C28H35N3O4	477.263	CC1(C=COC2=C(O1)C=CC3=C2NC(=O)[C@@]34C[C@@]56CN7CCCC[C@]7(C[C@H]5C4(C)C)C(=O)N6C)C	KYKUTNUWXQVSSU-ZALBMCOMSA-N	500.252	500.253	0.686709	2.30163	Na	2.70872
73	Ergocristam	C35H39N5O4	593.3	CC(C)[C@@H](C(=O)N1[C@H](C(=O)N2CCC[C@@H]2C1=O)CC3=CC=CC=C3)NC(=O)[C@H]4CN([C@@H]5CC6=CNC7=CC=CC(=C67)C5=C4)C	KMDKLWZQLMBIBS-HVWSGMRBSA-N	611.339	611.335	6.83435	0.973516	NH4	2.47283
74	Tylosin	C46H77NO17	915.519	CC[C@@H]1[C@H](/C=C(/C=C/C(=O)[C@@H](C[C@@H]([C@@H]([C@H]([C@@H](CC(=O)O1)O)C)O[C@H]2[C@@H]([C@H]([C@@H]([C@H](O2)C)O[C@H]3C[C@@]([C@H]([C@@H](O3)C)O)(C)O)N(C)C)O)CC=O)C)\C)CO[C@H]4[C@@H]([C@@H]([C@@H]([C@H](O4)C)O)OC)OC	WBPYTXDJUQJLPQ-VMXQISHHSA-N	916.527	916.527	0.41298	1.01192	H	3.15242
75	Marcfortine C	C27H33N3O3	447.252	CC1(C=CC2=C(O1)C=CC3=C2NC(=O)[C@@]34C[C@@]56CN7CCCC[C@]7(C[C@H]5C4(C)C)C(=O)N6)C	MEDWEEBWLKOHES-DWJNZRAMSA-N	470.242	470.242	0.916239	1.30542	Na	1.92223
76	Oxaspirodion	C13H14O5	250.084	C/C=C/[C@@H]1C=CC(=O)[C@@H](C12C(=O)C(OC2=O)C)O	XVPWAOPLQPCZBW-QKDXUVBESA-N	273.076	273.074	6.13295	1.27086	Na	1.97938
77	FS-4	C15H22O3	250.157	C[C@@]1(CC[C@](C=C1)(C)O)[C@]2(CC(=O)C=C2CO)C	MKMOUQVTTUPKSO-KFWWJZLASA-N	273.148	273.147	3.92173	1.08504	Na	1.60082
78	Cycloheximide	C15H23NO4	281.163	C[C@H]1C[C@@H](C(=O)[C@@H](C1)[C@@H](CC2CC(=O)NC(=O)C2)O)C	YPHMISFOHDHNIV-FSZOTQKASA-N	299.197	299.197	1.32297	2.39943	NH4	11.0086
79	Aurantine	C20H20O7	372.121	COC1=CC=C(C=C1)C2=C(C(=O)C3=CC(=C(C(=C3O2)OC)OC)OC)OC	DGNOHOXRWCCDLK-UHFFFAOYSA-N	373.129	373.129	1.92596	2.58634	H	2.58747
80	Colchicin	C22H25NO6	399.168	CC(=O)N[C@H]1CCC2=CC(=C(C(=C2C3=CC=C(C(=O)C=C13)OC)OC)OC)OC	IAKHMKGGTNLKSZ-INIZCTEOSA-N	422.161	422.158	6.90445	1.32812	Na	3.24533
81	Spirodihydrobenzofuranlactam IV	C28H37NO8	515.252	CC1CCC2C(C(CCC2(C13CC4=C(O3)C=C5C(=C4O)CN(C5=O)C(CCC(=O)O)C(=O)O)C)O)(C)C	XSIHIBRCLUCPAO-UHFFFAOYSA-N	533.287	533.286	0.607952	0.951585	NH4	5.73995
82	Ergocryptine	C32H41N5O5	575.311	CC(C)C[C@H]1C(=O)N2CCC[C@H]2[C@]3(N1C(=O)[C@](O3)(C(C)C)NC(=O)[C@H]4CN([C@@H]5CC6=CNC7=CC=CC(=C67)C5=C4)C)O	YDOTUXAWKBPQJW-NSLWYYNWSA-N	598.301	598.301	0.0862562	-1.04708	Na	2.14663
83	Pestalotin	C11H18O4	214.121	CCCC[C@@H]([C@@H]1CC(=CC(=O)O1)OC)O	YFIMUDXPJZVJJO-UWVGGRQHSA-N	237.112	237.11	6.76915	1.37794	Na	19.8512
84	Porritoxinol	C15H20O6	296.126	CC1=C(C=C2C(=C1OC)COC2=O)OC[C@@H](C(C)(C)O)O	WVJWALIKYTWYOP-LBPRGKRZSA-N	314.161	314.16	2.16134	2.00296	NH4	2.88747
85	Aflatoxin P1	C16H10O6	298.048	C1CC(=O)C2=C1C3=C(C4=C(C=C3O)O[C@@H]5[C@H]4C=CO5)OC2=O	NRCXNPKDOMYPPJ-HYORBCNSSA-N	316.082	316.082	0.00327704	2.20543	NH4	2.473
86	Aflatoxin B2	C17H14O6	314.079	COC1=C2C3=C(C(=O)CC3)C(=O)OC2=C4[C@@H]5CCO[C@@H]5OC4=C1	WWSYXEZEXMQWHT-WNWIJWBNSA-N	315.087	315.087	0.00884856	1.79165	H	2.98757
87	Ergocristine	C35H39N5O5	609.295	CC(C)[C@@]1(C(=O)N2[C@H](C(=O)N3CCC[C@H]3[C@@]2(O1)O)CC4=CC=CC=C4)NC(=O)[C@H]5CN([C@@H]6CC7=CNC8=CC=CC(=C78)C6=C5)C	HEFIYUQVAZFDEE-MKTPKCENSA-N	627.331	627.329	1.82464	-1.3314	NH4	1.98298
88	Cyclopenin	C17H14N2O3	294.1	CN1C(=O)C2=CC=CC=C2NC(=O)C13C(O3)C4=CC=CC=C4	APLKWZASYUZSBL-UHFFFAOYSA-N	312.135	312.135	0.102396	2.7973	NH4	2.78025
89	Ergocristinam	C35H39N5O4	593.3	CC(C)[C@@H](C(=O)N1[C@H](C(=O)N2CCC[C@@H]2C1=O)CC3=CC=CC=C3)NC(=O)[C@@H]4CN([C@@H]5CC6=CNC7=CC=CC(=C67)C5=C4)C	KMDKLWZQLMBIBS-GJOVNYRPSA-N	611.339	611.335	6.83435	0.973516	NH4	2.47283
90	Fungerin	C13H18N2O2	234.137	CC(=CCC1=C(N=CN1C)/C=C/C(=O)OC)C	LLJZWVUHEIKSRC-SOFGYWHQSA-N	235.145	235.145	0.0150313	1.13406	H	3.68802
91	Aflatoxin B1	C17H12O6	312.063	COC1=C2C3=C(C(=O)CC3)C(=O)OC2=C4[C@@H]5C=CO[C@@H]5OC4=C1	OQIQSTLJSLGHID-WNWIJWBNSA-N	313.071	313.071	0.00147893	1.24397	H	2.67315
92	Wortmannin	C23H24O8	428.147	CC(=O)O[C@@H]1C[C@]2([C@@H](CCC2=O)C3=C1[C@]4([C@H](OC(=O)C5=COC(=C54)C3=O)COC)C)C	QDLHCMPXEPAAMD-QAIWCSMKSA-N	446.181	446.181	0.117193	1.02897	NH4	2.62295
93	Questiomycin A	C12H8N2O2	212.059	C1=CC=C2C(=C1)N=C3C=C(C(=O)C=C3O2)N	RDJXPXHQENRCNG-UHFFFAOYSA-N	230.093	230.093	0.0258292	1.342	NH4	2.8087
94	Eremofortin B	C15H20O3	248.141	C[C@H]1[C@H]([C@@H]2[C@@H](O2)C3=CC(=O)[C@@H](C[C@]13C)C(=C)C)O	OXZGFGFICRZIFY-DURCKFPESA-N	249.148	249.149	4.40194	1.46142	H	1.7509
95	TR-2 Toxin	C22H27N3O6	429.19	CC(C)(C[C@H]1C2=C([C@@H]([C@@]3(N1C(=O)[C@@H]4CCCN4C3=O)O)O)C5=C(N2)C=C(C=C5)OC)O	PIWNJAZCHHBADQ-MECALSEWSA-N	447.228	447.224	7.65914	0.748126	NH4	1.9149
96	Paraherquamide E	C28H35N3O4	477.263	C[C@H]1CCN2[C@]13C[C@@H]4[C@](C2)(C[C@@]5(C4(C)C)C6=C(C7=C(C=C6)OC(C=CO7)(C)C)NC5=O)N(C3=O)C	XNXXZRQPTAQILV-PYGUQFFJSA-N	500.252	500.253	0.686709	2.30163	Na	2.70872
97	Ergocorninin	C31H39N5O5	561.295	CC(C)C1C(=O)N2CCCC2C3(N1C(=O)C(O3)(C(C)C)NC(=O)C4CN(C5CC6=CNC7=CC=CC(=C67)C5=C4)C)O	UJYGDMFEEDNVBF-UHFFFAOYSA-N	584.285	584.285	0.0782987	0.851234	Na	3.9598
98	T2-Triol	C20H30O7	382.199	CC1=CC2C(CC1OC(=O)CC(C)C)(C3(C(C(C(C34CO4)O2)O)O)C)CO	DDAUKBBLCGQHIP-UHFFFAOYSA-N	405.189	405.189	0.0251222	1.42903	Na	2.45878
99	Dechlorogriseofulvin	C17H18O6	318.11	C[C@@H]1CC(=O)C=C([C@]12C(=O)C3=C(O2)C=C(C=C3OC)OC)OC	QPCYNIYZPDJCMB-XLFHBGCDSA-N	336.145	336.145	1.46132	1.33468	NH4	1.31497
100	Roquefortine C	C22H23N5O2	389.185	CC(C)(C=C)[C@@]12C[C@H]3C(=O)N/C(=C/C4=CN=CN4)/C(=O)N3[C@@H]1NC5=CC=CC=C25	SPWSUFUPTSJWNG-JJUKSXGLSA-N	390.194	390.193	2.07654	0.168788	H	1.06502
101	Josamycin	C42H69NO15	827.467	C[C@@H]1C/C=C/C=C/[C@@H]([C@@H](C[C@@H]([C@@H]([C@H]([C@@H](CC(=O)O1)OC(=O)C)OC)O[C@H]2[C@@H]([C@H]([C@@H]([C@H](O2)C)O[C@H]3C[C@@]([C@H]([C@@H](O3)C)OC(=O)CC(C)C)(C)O)N(C)C)O)CC=O)C)O	XJSFLOJWULLJQS-NGVXBBESSA-N	828.475	828.475	0.092475	1.67696	H	11.7954
102	Xanthotoxin	C12H8O4	216.042	COC1=C2C(=CC3=C1OC=C3)C=CC(=O)O2	QXKHYNVANLEOEG-UHFFFAOYSA-N	217.05	217.05	0.0878286	1.51028	H	2.43027
103	Sambucinol	C15H22O4	266.152	CC1=C[C@]23[C@](CC1)([C@]4(C[C@@H]([C@H]([C@]4(O2)CO)O3)O)C)C	GFLMBFRNOPTZDK-CMBQYIQPSA-N	267.16	267.16	2.32849	1.35961	H	2.25863
104	Austamide	C21H21N3O3	363.158	CC1(C=CN2C(CC13C(=O)C4=CC=CC=C4N3)C(=O)N5CCC=C5C2=O)C	LBFQJHHYMJAUKS-UHFFFAOYSA-N	364.166	364.166	1.18067	1.36435	H	4.05342
105	Tryptoquivaline F	C22H18N4O4	402.133	C[C@H]1C(=O)N2[C@@H](N1)[C@]3(C[C@H](C(=O)O3)N4C=NC5=CC=CC=C5C4=O)C6=CC=CC=C62	ZVBIGFFAMBWOSA-RGKJGADRSA-N	425.123	425.123	0.126269	0.707258	Na	2.53033
106	Trypacidin	C18H16O7	344.09	CC1=CC2=C(C(=C1)OC)C(=O)C3(O2)C(=CC(=O)C=C3OC)C(=O)OC	KMZYINVXZDQCKC-UHFFFAOYSA-N	367.079	367.079	0.0251771	1.3706	Na	2.68022
107	Staurosporin	C28H26N4O3	466.2	C[C@@]12[C@@H]([C@@H](C[C@@H](O1)N3C4=CC=CC=C4C5=C6C(=C7C8=CC=CC=C8N2C7=C53)CNC6=O)NC)OC	HKSZLNNOFSGOKW-FYTWVXJKSA-N	484.23	484.235	8.9785	0.94072	NH4	2.02202
108	Cyclopeptine	C17H16N2O2	280.121	CN1C(C(=O)NC2=CC=CC=C2C1=O)CC3=CC=CC=C3	KSQNKZMAMGACTL-UHFFFAOYSA-N	281.129	281.129	0.520474	1.87795	H	2.78017
109	Aflatoxicol	C17H14O6	314.079	COC1=C2C3=C([C@H](CC3)O)C(=O)OC2=C4[C@@H]5C=CO[C@@H]5OC4=C1	WYIWLDSPNDMZIT-IRWWLHRVSA-N	315.087	315.087	0.00884856	1.79165	H	2.98757
110	Vermistatin	C18H16O6	328.095	C/C=C/C1=CC(=O)C(=CO1)[C@H]2C3=C(C=C(C=C3OC)OC)C(=O)O2	YORFGPDHNOBVBM-BDUNBXCCSA-N	329.103	329.102	1.406	1.30219	H	4.23963
111	Ergocryptinine	C32H41N5O5	575.311	CC(C)C[C@H]1C(=O)N2CCC[C@H]2[C@]3(N1C(=O)[C@](O3)(C(C)C)NC(=O)[C@@H]4CN([C@@H]5CC6=CNC7=CC=CC(=C67)C5=C4)C)O	YDOTUXAWKBPQJW-JJANYQHSSA-N	598.301	598.301	0.0862562	-1.04708	Na	2.14663
112	Asperfuran	C13H14O3	218.094	C/C=C/C=C/[C@H]1CC2=C(O1)C(=CC(=C2)O)O	WTFIFQXTQCYJKU-JWVODRKRSA-N	219.102	219.102	0.233794	1.26447	H	22.3331
113	Quadrone	C15H20O3	248.141	CC1(CC23C4CCC1C2CC(=O)C3COC4=O)C	BBIDMUQZCCGABN-UHFFFAOYSA-N	249.148	249.149	4.40194	1.46142	H	1.7509
114	Trichostatin A	C17H22N2O3	302.163	C[C@H](/C=C(\C)/C=C/C(=O)NO)C(=O)C1=CC=C(C=C1)N(C)C	RTKIYFITIVXBLE-QEQCGCAPSA-N	325.154	325.153	3.99235	1.29277	Na	2.57312
115	Fumonisin B1	C34H59NO15	721.388	CCCC[C@@H](C)[C@H]([C@H](C[C@@H](C)C[C@@H](CCCC[C@H](C[C@@H]([C@H](C)N)O)O)O)OC(=O)C[C@@H](CC(=O)O)C(=O)O)OC(=O)C[C@@H](CC(=O)O)C(=O)O	UVBUBMSSQKOIBE-DSLOAKGESA-N	739.422	739.423	0.530506	2.41201	NH4	10.6941
116	Penicillin G	C16H18N2O4S	334.099	CC1([C@@H](N2[C@H](S1)[C@@H](C2=O)NC(=O)CC3=CC=CC=C3)C(=O)O)C	JGSARLDLIJGVTE-MBNYWOFBSA-N	352.13	352.133	8.03885	1.84793	NH4	4.0466
117	Cerulenin	C12H17NO3	223.121	C/C=C/C/C=C/CCC(=O)[C@@H]1[C@@H](O1)C(=O)N	GVEZIHKRYBHEFX-NQQPLRFYSA-N	246.113	246.111	9.52035	0.167609	Na	1.67227
118	Dehydrocyclopeptine	C17H14N2O2	278.106	CN1/C(=C\C2=CC=CC=C2)/C(=O)NC3=CC=CC=C3C1=O	FYVKHLSOIIPVEH-PTNGSMBKSA-N	296.14	296.14	0.0342017	1.69541	NH4	2.78038
119	HT-2 toxin	C22H32O8	424.21	CC1=C[C@@H]2[C@](C[C@@H]1OC(=O)CC(C)C)([C@]3([C@@H]([C@H]([C@H]([C@@]34CO4)O2)O)O)C)COC(=O)C	PNKLMTPXERFKEN-MLXHEQMXSA-N	442.245	442.244	1.70205	2.0073	NH4	4.23898
120	Cytochalasin J	C28H37NO4	451.272	CC1CC=CC2C(C(=C)C(C3C2(C(C=CC(C1)(C)O)O)C(=O)NC3CC4=CC=CC=C4)C)O	UKQNIEMKORIOQM-UHFFFAOYSA-N	452.278	452.28	5.00347	1.02056	H	6.19798
121	Ergocristinine	C35H39N5O5	609.295	CC(C)[C@@]1(C(=O)N2[C@H](C(=O)N3CCC[C@H]3[C@@]2(O1)O)CC4=CC=CC=C4)NC(=O)[C@@H]5CN([C@@H]6CC7=CNC8=CC=CC(=C78)C6=C5)C	HEFIYUQVAZFDEE-NASJTFDLSA-N	627.331	627.329	1.82464	-1.3314	NH4	1.98298
122	Phenopyrrozin	C13H13NO2	215.095	C1CC2C(=C(C(=O)N2C1)O)C3=CC=CC=C3	APSZCQZJXWEGJS-UHFFFAOYSA-N	216.102	216.102	0.527484	1.69624	H	1.72213
123	Sydowinin A	C16H12O6	300.063	COC(=O)C1=C2C(=CC=C1)OC3=CC(=CC(=C3C2=O)O)CO	UBYOEDLUKKPPPN-UHFFFAOYSA-N	301.071	301.071	0.78026	1.57108	H	2.14458
124	Methylfunicone	C20H20O8	388.116	C/C=C/C1=C(C(=O)C(=CO1)C(=O)C2=C(C=C(C=C2OC)OC)C(=O)OC)OC	WGLRJONCGNNMKL-VOTSOKGWSA-N	411.107	411.106	3.17217	1.4466	Na	2.30168
125	Brefeldin A	C16H24O4	280.167	C[C@H]1CCC/C=C/[C@@H]2C[C@@H](C[C@H]2[C@@H](/C=C/C(=O)O1)O)O	KQNZDYYTLMIZCT-KQPMLPITSA-N	281.176	281.175	4.20709	1.54748	H	4.67453
126	Calonectrin	C19H26O6	350.173	CC1=C[C@@H]2[C@](CC1)([C@]3(C[C@H]([C@H]([C@@]34CO4)O2)OC(=O)C)C)COC(=O)C	IGDIDZAQDRAJRB-UPGMHYFXSA-N	351.181	351.181	0.645565	0.73223	H	6.58427
127	Tryprostatin A	C22H27N3O3	381.205	CC(=CCC1=C(C2=C(N1)C=C(C=C2)OC)C[C@H]3C(=O)N4CCC[C@H]4C(=O)N3)C	XNRPVPHNDQHWLJ-PMACEKPBSA-N	399.24	399.24	0.00754079	0.851234	NH4	3.9598
128	Asteltoxin	C23H30O7	418.199	CC[C@@H]1[C@]([C@]2([C@H]([C@H](O[C@H]2O1)/C=C/C=C/C=C/C3=C(C(=CC(=O)O3)OC)C)O)C)(C)O	GPXPJKFETRLRAS-AHUKKWBBSA-N	419.207	419.207	0.432473	1.37828	H	4.14643
129	Roquefortine E	C27H31N5O2	457.248	CC(C)(C=C)C1=C(N=CN1)/C=C/2\C(=O)N3[C@@H](C[C@@]4([C@H]3NC5=CC=CC=C54)C(C)(C)C=C)C(=O)N2	YOEIOWQHMDDCDD-HJILTBFVSA-N	480.236	480.238	4.16655	1.64884	Na	3.90957
130	Cytochalasin D	C30H37NO6	507.262	C[C@H]1C/C=C/[C@H]2[C@@H](C(=C)[C@H]([C@@H]3[C@@]2([C@@H](/C=C/[C@@](C1=O)(C)O)OC(=O)C)C(=O)N[C@H]3CC4=CC=CC=C4)C)O	SDZRWUKZFQQKKV-JHADDHBZSA-N	525.296	525.296	0.187437	1.74011	NH4	3.36712
131	Destruxin D	C30H49N5O9	623.353	CC[C@H](C)[C@H]1C(=O)N([C@H](C(=O)N([C@H](C(=O)NCCC(=O)O[C@@H](C(=O)N2CCC[C@H]2C(=O)N1)CC(C)C(=O)O)C)C)C(C)C)C	WTVZRLMVNARECX-ATPFRWRASA-N	641.391	641.387	5.68867	0.931238	NH4	2.52282
132	15-Hydroxyculmorin	C15H26O3	254.188	C[C@@]1(CCC[C@@]2([C@@H]3[C@H]1[C@H]([C@]2(C[C@H]3O)C)O)C)CO	OLWYTMKUCGVHCZ-IKIFBEIWSA-N	277.18	277.178	5.5908	1.30149	Na	16.9919
133	Monocerin	C16H20O6	308.126	CCC[C@H]1C[C@@H]2[C@H](O1)C3=CC(=C(C(=C3C(=O)O2)O)OC)OC	VAYQNUBOZLPGDH-OLXJLDBKSA-N	326.16	326.16	0.172912	1.19217	NH4	2.25878
134	Anacin	C8H10N4O2	194.08	CN1C=NC2=C1C(=O)N(C(=O)N2C)C	RYYVLZVUVIJVGH-UHFFFAOYSA-N	217.07	217.07	0.960384	0.929698	Na	1.85788
135	Tryprostatin B	C21H25N3O2	351.195	CC(=CCC1=C(C2=CC=CC=C2N1)C[C@H]3C(=O)N4CCC[C@H]4C(=O)N3)C	GLWYBXPXOSKQAW-OALUTQOASA-N	352.202	352.202	0.0598272	1.9078	H	2.78727
136	Satratoxin H	C29H36O9	528.236	CC1=CC2C3(CC1)COC(=O)/C=C/4\CCOC(C4O)(C=CC=CC(=O)OC5C3(C6(CO6)C(C5)O2)C)C(C)O	MUACSCLQRGEGOE-FGBCDFEGSA-N	529.248	529.244	7.84178	1.4698	H	1.72917
137	Destruxin CHL	C29H48ClN5O8	629.319	CCC(C)[C@H]1C(=O)N([C@H](C(=O)N([C@H](C(=O)NCCC(=O)O[C@@H](C(=O)N2CCC[C@H]2C(=O)N1)CC(CCl)O)C)C)C(C)C)C	WUTLOXOGFQPKLT-FFIXUCITSA-N	647.355	647.353	2.60504	1.2786	NH4	4.48203
138	5-Methylmellein	C11H12O3	192.079	C[C@@H]1CC2=C(C=CC(=C2C(=O)O1)O)C	YETSBBYQOFXYGV-SSDOTTSWSA-N	215.07	215.068	5.89838	0.901896	Na	3.24527
139	Berkeleyacetal B	C26H30O9	486.189	C[C@H]1C(=O)[C@@]2([C@@H]3[C@H](O1)OC(=O)[C@@]3(C[C@@H]4[C@@]2(CC=C5C(=CC(=O)OC5(C)C)[C@@]46CO6)C)C)C(=O)OC	XZKVBCSVEVIEBX-YJCISAIBSA-N	487.196	487.197	1.03956	0.683561	H	3.14557
140	Penicillin V	C16H18N2O5S	350.094	CC1([C@@H](N2[C@H](S1)[C@@H](C2=O)NC(=O)COC3=CC=CC=C3)C(=O)O)C	BPLBGHOLXOTWMN-MBNYWOFBSA-N	373.081	373.083	6.63362	1.64884	Na	9.729
141	Fumonisin A1	C36H61NO16	763.399	CCCC[C@@H](C)[C@H]([C@H](C[C@@H](C)C[C@@H](CCCC[C@@H](C[C@H]([C@@H](C)NC(=O)C)O)O)O)OC(=O)C[C@@H](CC(=O)O)C(=O)O)OC(=O)C[C@@H](CC(=O)O)C(=O)O	ADACAMXIRQREOB-XUJMDKETSA-N	781.433	781.433	0.690962	1.85873	NH4	11.602
142	Cytochalasin B	C29H37NO5	479.267	C[C@@H]1CCC[C@H](/C=C/C(=O)O[C@]23[C@@H](/C=C/C1)[C@@H](C(=C)[C@H]([C@H]2[C@@H](NC3=O)CC4=CC=CC=C4)C)O)O	GBOGMAARMMDZGR-TYHYBEHESA-N	480.275	480.275	0.691025	1.94892	H	6.10503
143	Fumagillol	C16H26O4	282.183	CC(=CC[C@@H]1[C@@](O1)(C)[C@H]2[C@@H]([C@@H](CC[C@]23CO3)O)OC)C	CEVCTNCUIVEQOY-JQOWZUPLSA-N	305.172	305.173	2.50292	0.901896	Na	3.19528
144	Trichothecin	C19H24O5	332.162	C/C=C\C(=O)O[C@@H]1C[C@@H]2[C@]3([C@]1([C@]4(CC(=O)C(=C[C@H]4O2)C)C)C)CO3	LJWZOKOFCBPNAG-HULHSAFCSA-N	333.17	333.17	0.83368	1.05686	H	6.58437
145	Citreoviridinol	C23H30O7	418.199	C[C@@H]1[C@]2(C([C@@](O1)([C@H]([C@@](O2)(C)/C=C/C=C/C=C/C3=C(C(=CC(=O)O3)OC)C)O)C)O)C	BHMIDMOHWXULQB-NXIHKJPGSA-N	419.207	419.207	0.432473	1.37828	H	4.14643
146	T-2 toxin	C24H34O9	466.22	CC1=C[C@@H]2[C@](C[C@@H]1OC(=O)CC(C)C)([C@]3([C@@H]([C@H]([C@H]([C@@]34CO4)O2)O)OC(=O)C)C)COC(=O)C	BXFOFFBJRFZBQZ-QYWOHJEZSA-N	489.211	489.21	2.21156	2.11629	Na	3.00873
147	Destruxin A	C29H47N5O7	577.348	CC[C@H](C)[C@H]1C(=O)N([C@H](C(=O)N([C@H](C(=O)NCCC(=O)O[C@@H](C(=O)N2CCC[C@H]2C(=O)N1)CC=C)C)C)C(C)C)C	XIYSEKITPHTMJT-OCCJOITDSA-N	578.354	578.355	2.03063	1.47504	H	4.60333
148	Fumonisin B3	C34H59NO14	705.394	CCCC[C@@H](C)[C@H]([C@H](C[C@@H](C)C[C@@H](CCCCCC[C@H]([C@H](C)N)O)O)OC(=O)CC(CC(=O)O)C(=O)O)OC(=O)CC(CC(=O)O)C(=O)O	CPCRJSQNWHCGOP-KUHXKYQKSA-N	706.401	706.401	0.95742	1.46152	H	5.5465
149	Ochratoxin B	C20H19NO6	369.121	C[C@@H]1CC2=C(C(=C(C=C2)C(=O)N[C@@H](CC3=CC=CC=C3)C(=O)O)O)C(=O)O1	DAEYIVCTQUFNTM-ABAIWWIYSA-N	370.126	370.129	7.51837	0.735295	H	17.5994
150	Fumitremorgin C	C22H25N3O3	379.19	CC(=C[C@H]1C2=C(C[C@@H]3N1C(=O)[C@@H]4CCCN4C3=O)C5=C(N2)C=C(C=C5)OC)C	DBEYVIGIPJSTOR-FHWLQOOXSA-N	380.197	380.197	0.0271991	1.47702	H	2.77995
151	Verrucarin A	C27H34O9	502.22	C[C@@H]1CCOC(=O)/C=C/C=C\C(=O)O[C@@H]2C[C@@H]3[C@]4([C@]2([C@]5(CCC(=C[C@H]5O3)C)COC(=O)[C@H]1O)C)CO4	NLUGUZJQJYVUHS-IDXDZYHTSA-N	520.255	520.255	0.051872	0.831892	NH4	2.81587
152	Roridin A	C29H40O9	532.267	C[C@@H]1CCO[C@H](/C=C/C=C\C(=O)O[C@@H]2C[C@@H]3[C@]4([C@]2([C@]5(CCC(=C[C@H]5O3)C)COC(=O)[C@H]1O)C)CO4)[C@@H](C)O	NSFWWJIQIKBZMJ-PAGWOCKZSA-N	550.302	550.302	0.0686891	1.28351	NH4	6.14803
153	Gregatin B	C14H18O4	250.121	CC/C=C/C=C/[C@@]1(C(=O)C(=C(O1)C)C(=O)OC)C	BNZPIQOOHVBONM-PAMVGZKNSA-N	273.11	273.11	2.80149	0.851234	Na	1.04368
154	Koninginin E	C16H26O4	282.183	CCCCCC[C@@H]([C@@H]1CCC2=C(O1)[C@@H](CCC2=O)O)O	INHVGPIPHZJQOP-ZNMIVQPWSA-N	305.172	305.173	2.50292	0.901896	Na	3.19528
155	Austalide F	C26H34O9	490.22	CC1=C2COC(=O)C2=C(C3=C1O[C@]4(C[C@H]([C@@]56[C@@]([C@H]4C3)([C@@H](C[C@@](O5)(OC6(C)C)OC)O)C)O)C)OC	UHBMKIHOBUKYRH-BXYHISHMSA-N	491.23	491.228	3.92506	1.50978	H	2.1015
156	Cytochalasin C	C30H37NO6	507.262	CC1CC=CC2C(C(=C(C3C2(C(C=CC(C1=O)(C)O)OC(=O)C)C(=O)NC3CC4=CC=CC=C4)C)C)O	NAIODHJWOHMDJX-UHFFFAOYSA-N	525.296	525.296	0.187437	1.74011	NH4	3.36712
157	Zinniol	C15H22O4	266.152	CC1=C(C=C(C(=C1OC)CO)CO)OCC=C(C)C	DUMQPTRUYCCSEZ-UHFFFAOYSA-N	267.16	267.16	2.32849	1.35961	H	2.25863
158	Chaetoglobosin D	C32H36N2O5	528.262	C[C@H]\1C/C=C/[C@H]2[C@@H](C(=C)[C@H]([C@@H]3[C@@]2(C(=O)/C=C/C(=O)[C@@H](/C(=C1)/C)O)C(=O)N[C@H]3CC4=CNC5=CC=CC=C54)C)O	FTBNYQWFSWKCKW-WHHLLCSSSA-N	551.253	551.252	1.78429	1.47616	Na	3.29552
159	Aspterric acid	C15H22O4	266.152	CC(=C1CCC23[C@H]1CC[C@H]([C@@H](C2)OC3)C(=O)OO)C	AMVWWAIZPPESMM-WORDMNGFSA-N	267.16	267.16	2.32849	1.35961	H	2.25863
160	Purpuride	C22H33NO5	391.236	CC(C)[C@@H](C(=O)O[C@H]1CCC([C@H]2[C@]1(C3=C(CC2)C(=O)OC3)C)(C)C)NC(=O)C	NEMKJBVVPNFVCU-VDNWNZSNSA-N	409.27	409.27	0.0903593	1.47702	NH4	2.7514
161	Roridin L2	C29H38O9	530.252	CC1=C[C@@H]2[C@](CC1)([C@]3([C@@H](C[C@H]([C@@]34CO4)O2)OC(=O)/C=C\C=C\C(C(C)O)OCCC5=CC(=O)OC5)C)CO	JGIYRVDWRBKREW-JNMAXWDTSA-N	531.259	531.259	0.0472594	1.33901	H	3.6737
162	O-Methylviridicatin	C16H13NO2	251.095	COC1=C(C2=CC=CC=C2NC1=O)C3=CC=CC=C3	NDTLHHOQSHJIMX-UHFFFAOYSA-N	269.129	269.129	0.0385724	1.28123	NH4	2.5159
163	WIN-64821	C40H36N6O4	664.28	C1[C@H]2C(=O)N[C@H](C(=O)N2[C@@H]3[C@]1(C4=CC=CC=C4N3)[C@]56C[C@H]7C(=O)N[C@H](C(=O)N7[C@H]5NC8=CC=CC=C68)CC9=CC=CC=C9)CC1=CC=CC=C1	ZEANERNKMXBETI-BJHDJDSNSA-N	665.288	665.288	0.0241058	1.71267	H	2.58723
164	Fumonisin B6	C34H59NO15	721.388	CCCC[C@@H](C)[C@H]([C@H](C[C@@H](C)CCCCCCC(C([C@@H]([C@H](C)N)O)O)O)OC(=O)C[C@@H](CC(=O)O)C(=O)O)OC(=O)C[C@@H](CC(=O)O)C(=O)O	WQXBMSIHHKRGPX-TWFRCCRHSA-N	739.422	739.423	0.530506	2.41201	NH4	10.6941
165	Pyripyropene A	C31H37NO10	583.242	CC(=O)OC[C@@]1([C@H](CC[C@]2([C@H]1C[C@@H]([C@@]3([C@@H]2[C@H](C4=C(O3)C=C(OC4=O)C5=CN=CC=C5)O)C)OC(=O)C)C)OC(=O)C)C	PMMQOFWSZRQWEV-RVTXXDJVSA-N	584.25	584.25	0.00402296	2.01792	H	3.26663
166	Territrem B	C29H34O9	526.22	C[C@@]12CC[C@@]3([C@@]([C@]1(CC4=C(O2)C=C(OC4=O)C5=CC(=C(C(=C5)OC)OC)OC)O)(C(=O)C=CC3(C)C)C)O	PBXNNDFKPQPJBB-VJLHXPKFSA-N	544.259	544.255	8.73045	-0.796585	NH4	5.68273
167	Fumonisin B2	C34H59NO14	705.394	CCCC[C@@H](C)[C@H]([C@H](C[C@@H](C)CCCCCC[C@H](C[C@@H]([C@H](C)N)O)O)OC(=O)C[C@@H](CC(=O)O)C(=O)O)OC(=O)C[C@@H](CC(=O)O)C(=O)O	UXDPXZQHTDAXOZ-STOIETHLSA-N	706.401	706.401	0.95742	1.46152	H	5.5465
168	Cytochalasin A	C29H35NO5	477.252	C[C@@H]1CCCC(=O)/C=C/C(=O)O[C@]23[C@@H](/C=C/C1)[C@@H](C(=C)[C@H]([C@H]2[C@@H](NC3=O)CC4=CC=CC=C4)C)O	ZMAODHOXRBLOQO-TZVKRXPSSA-N	500.241	500.241	0.73681	1.32961	Na	1.74347
169	Aspochalasin D	C24H35NO4	401.257	C[C@H]1[C@H]2[C@@H](NC(=O)[C@@]23[C@@H](/C=C(\CC[C@H]([C@H](/C=C\C3=O)O)O)/C)C=C1C)CC(C)C	GCIKKGSNXSCKCP-IJDGJKBTSA-N	419.291	419.291	0.0454716	1.92979	NH4	2.55162
170	Verrucofortine	C24H31N3O3	409.237	CC(C)C[C@H]1C(=O)N2[C@@H](C[C@@]3([C@H]2N(C4=CC=CC=C43)C(=O)C)C(C)(C)C=C)C(=O)N1	BMRZKNPRSPWNNW-UNBWHIKDSA-N	427.268	427.271	6.41328	2.7973	NH4	2.78025
171	Prehelminthosporol	C15H24O2	236.178	CC(C)C1CCC2(C3C1C(C2=C)C(OC3)O)C	RVFULFDTCDRKNZ-UHFFFAOYSA-N	259.167	259.167	3.49231	1.63056	Na	2.323
172	Citreoviridin	C23H30O6	402.204	C[C@@H]1[C@]([C@H]([C@](O1)(C)/C=C(\C)/C=C/C=C/C=C/C2=C(C(=CC(=O)O2)OC)C)O)(C)O	JLSVDPQAIKFBTO-OMCRQDLASA-N	425.193	425.194	2.09354	1.57108	Na	2.31603
173	Asperglaucide	C27H28N2O4	444.205	CC(=O)OC[C@H](CC1=CC=CC=C1)NC(=O)[C@H](CC2=CC=CC=C2)NC(=O)C3=CC=CC=C3	VZPAURMDJZOGHU-DQEYMECFSA-N	462.239	462.239	0.00749927	1.18686	NH4	4.66748
174	Destruxin B	C30H51N5O7	593.379	CCC(C)C1C(=O)N(C(C(=O)N(C(C(=O)NCCC(=O)OC(C(=O)N2CCCC2C(=O)N1)CC(C)C)C)C)C(C)C)C	GNBHVMBELHWUIF-UHFFFAOYSA-N	616.365	616.369	6.47453	0.77676	Na	5.72533
175	Dihydrosterigmatocystin	C18H14O6	326.079	COC1=C2C(=C3[C@@H]4CCO[C@@H]4OC3=C1)OC5=CC=CC(=C5C2=O)O	RHGQIWVTIHZRLI-DCXZOGHSSA-N	327.087	327.087	0.40106	1.10678	H	3.4312
176	Culmorin	C15H26O2	238.193	CC1(CCCC2(C3C1C(C2(CC3O)C)O)C)C	VWMGBHVRRNKOAE-UHFFFAOYSA-N	261.184	261.183	4.98537	0.929779	Na	7.38462
177	Spiculisporic acid	C17H28O6	328.189	CCCCCCCCCCC(C(=O)O)C1(CCC(=O)O1)C(=O)O	TUXHHVJPGQUPCF-UHFFFAOYSA-N	351.18	351.178	3.42521	-0.962469	Na	6.62715
178	Methoxysterigmatocystin	C19H14O7	354.074	COC1=C2C(=C(C=C1)O)C(=O)C3=C(C=C4C(=C3O2)[C@@H]5C=CO[C@@H]5O4)OC	VVRUNWFPOWIBDY-WPCRTTGESA-N	372.11	372.108	4.25398	1.67105	NH4	10.9945
179	Cycloaspeptide A	C36H43N5O6	641.321	C[C@H]1C(=O)N([C@H](C(=O)N[C@H](C(=O)N([C@H](C(=O)NC2=CC=CC=C2C(=O)N1)CC3=CC=C(C=C3)O)C)CC(C)C)CC4=CC=CC=C4)C	UPNQAUFZWGKHGZ-IAURBROLSA-N	642.328	642.329	2.44513	0.819394	H	1.672
180	Sterigmatocystin	C18H12O6	324.063	COC1=C2C(=C3[C@@H]4C=CO[C@@H]4OC3=C1)OC5=CC=CC(=C5C2=O)O	UTSVPXMQSFGQTM-DCXZOGHSSA-N	325.071	325.071	0.0117341	2.01191	H	3.65235
181	Sphingofungin B	C20H39NO6	389.278	CCCCCC[C@H](CCCCCC/C=C/[C@@H]([C@H]([C@@H]([C@@H](C(=O)O)N)O)O)O)O	UAPFYKYEEDCCTL-MXSQXUFFSA-N	390.284	390.286	3.55735	1.38783	H	8.99207
182	Brevicompanine B	C22H29N3O2	367.226	CC(C)C[C@@H]1C(=O)N2[C@@H](C[C@@]3([C@H]2NC4=CC=CC=C43)C(C)(C)C=C)C(=O)N1	HAXPBJUEOMQIJN-HBCLNWRISA-N	390.217	390.216	1.95776	1.04097	Na	4.71773
183	Rasfonin	C25H38O6	434.267	C/C=C(\C)/C[C@H](C)C[C@H](C)[C@@H]1[C@@H](C=CC(=O)O1)OC(=O)/C=C/C(=C/[C@H](CCO)CO)/C	OHRGHFXATDKGOV-FXYCKZMJSA-N	435.273	435.275	2.71315	1.37432	H	6.40493
184	Austalide B	C26H34O8	474.225	CC1=C2COC(=O)C2=C(C3=C1O[C@]4(C[C@H]([C@@]56[C@@]([C@H]4C3)(CC[C@@](O5)(OC6(C)C)OC)C)O)C)OC	ZVFMDVFPBVFGPG-BLQNBILZSA-N	497.215	497.215	1.24095	1.23667	Na	3.3955
185	Fumonisin B4	C34H59NO13	689.399	CCCC[C@@H](C)[C@H]([C@H](C[C@@H](C)CCCCCCCC[C@@H]([C@H](C)N)O)OC(=O)C[C@@H](CC(=O)O)C(=O)O)OC(=O)C[C@@H](CC(=O)O)C(=O)O	WYYKRDVIBOEORL-JLCKPESSSA-N	690.405	690.406	2.78904	1.88079	H	6.55463
186	Harzianum A	C23H28O6	400.189	CC1=C[C@@H]2[C@](CC1)([C@]3([C@@H](C[C@H]([C@@]34CO4)O2)OC(=O)/C=C\C=C\C=C\C(=O)O)C)C	FVRDNLIUSWSBCT-VOJRNIOYSA-N	423.179	423.178	2.23659	1.07245	Na	3.25252
187	Puberulin A	C23H28O6	400.189	C[C@H]1[C@@H]([C@@H]2[C@@H]([C@]1(C=C(C2=O)CC=C)OC)OC(=O)C)C3=CC(=C(C=C3)OC)OC	TVDQUJSTRADHSU-VNTFTLRASA-N	423.179	423.178	2.23659	1.07245	Na	3.25252
188	Purpactin A	C23H26O7	414.168	CC1=CC2=C(C(=C1)O)OC3=C(C(=C(C=C3)[C@H](CC(C)C)OC(=O)C)OC)C(=O)OC2	NUYFKDBCHFKOBT-IBGZPJMESA-N	432.206	432.202	7.84757	1.19223	NH4	1.68638
189	Verruculogen	C27H33N3O7	511.232	CC(=C[C@@H]1N2C3=C(C=CC(=C3)OC)C4=C2[C@H](CC(OO1)(C)C)N5C(=O)[C@@H]6CCCN6C(=O)[C@@]5([C@H]4O)O)C	LRXYHMMJJCTUMY-GWXUGYLUSA-N	534.222	534.222	0.0807176	0.901896	Na	4.0534
190	Chaetoglobosin A	C32H36N2O5	528.262	C[C@H]\1C/C=C/[C@H]2[C@H]3[C@](O3)([C@H]([C@@H]4[C@@]2(C(=O)/C=C/C(=O)[C@@H](/C(=C1)/C)O)C(=O)N[C@H]4CC5=CNC6=CC=CC=C65)C)C	OUMWCYMRLMEZJH-VOXRAUTJSA-N	551.253	551.252	1.78429	1.47616	Na	3.29552
191	Myriocin	C21H39NO6	401.278	CCCCCCC(=O)CCCCCC/C=C/C[C@H]([C@@H]([C@@](CO)(C(=O)O)N)O)O	ZZIKIHCNFWXKDY-GNTQXERDSA-N	424.268	424.268	0.0247208	1.44717	Na	2.76598
192	Diplodiatoxin	C18H28O4	308.199	CC1C[C@H]2C=C([C@H]([C@@](C2C(C1)C)(C)C(=O)CCO)C(=O)O)C	SFTQDPVLDKOILY-CSVHMLKNSA-N	309.206	309.207	0.244122	1.59622	H	9.4432
193	Ophiobolin A	C25H36O4	400.261	C[C@H]1C[C@@H](O[C@@]12CC[C@]3([C@H]2C/C=C(\[C@@H]4[C@H](C3)[C@](CC4=O)(C)O)/C=O)C)C=C(C)C	MWYYLZRWWNBROW-BDZRSQQBSA-N	423.252	423.251	2.07426	1.57081	Na	2.50872
194	Verrucosidin	C24H32O6	416.22	C[C@@H]1[C@@]2([C@@H](O2)[C@](O1)(C)/C=C(\C)/C=C(\C)/[C@H]3[C@](O3)(C)C4=C(C(=C(C(=O)O4)C)OC)C)C	JSVLNARHSWZARV-FOOXNAEUSA-N	417.229	417.228	2.82535	1.48754	H	2.20165
195	Aspochalasin I	C24H35NO5	417.252	C[C@H]1[C@H]2[C@@H](NC(=O)[C@@]23[C@@H](/C=C(/CC[C@@H]([C@@H](/C=C/C(=O)O3)O)O)\C)C=C1C)CC(C)C	TYOGSRFPSVCJQL-QYNSZGEFSA-N	435.286	435.286	0.0489309	1.69065	NH4	2.33023
196	Citreoviridin C	C23H30O6	402.204	CC1C(C(C(O1)(C)/C=C(\C)/C=C\C=C\C=C/C2=CC(=C(C(=O)O2)C)OC)O)(C)O	QPSHETAOAVLQIF-MAUVYNLPSA-N	425.193	425.194	2.09354	1.57108	Na	2.31603
197	Fumagillin	C26H34O7	458.23	CC(=CC[C@@H]1[C@@](O1)(C)[C@H]2[C@@H]([C@@H](CC[C@]23CO3)OC(=O)/C=C/C=C/C=C/C=C/C(=O)O)OC)C	NGGMYCMLYOUNGM-CSDLUJIJSA-N	481.22	481.22	0.021391	1.85419	Na	3.13827
198	Fumonisin A2	C36H61NO15	747.404	CCCC[C@@H](C)[C@H]([C@H](C[C@@H](C)CCCCCC[C@@H](C[C@H]([C@@H](C)NC(=O)C)O)O)OC(=O)C[C@@H](CC(=O)O)C(=O)O)OC(=O)C[C@@H](CC(=O)O)C(=O)O	GQCJWFPDXATUKS-HWLZWWINSA-N	770.393	770.394	1.80364	0.677615	Na	1.99738
199	Stachybotrylactam	C23H31NO4	385.225	CC1CCC2C(C(CCC2(C13CC4=C(C=C5C(=C4O3)CNC5=O)O)C)O)(C)C	ZSVLMDBFFSSVAK-UHFFFAOYSA-N	403.263	403.26	7.78503	1.18849	NH4	3.83097
200	Austalide A	C28H36O9	516.236	CC1=C2COC(=O)C2=C(C3=C1O[C@]4(C[C@H]([C@@]56[C@@]([C@H]4C3)(CC[C@@](O5)(OC6(C)C)OC)C)OC(=O)C)C)OC	JVCNHGXAVMINTN-QBNAFFQBSA-N	517.244	517.244	0.0357587	1.08538	H	3.30982
201	Enniatin B3	C31H53N3O9	611.378	CC(C)[C@H]1C(=O)O[C@@H](C(=O)N([C@H](C(=O)O[C@@H](C(=O)N[C@H](C(=O)O[C@@H](C(=O)N1)C(C)C)C(C)C)C(C)C)C(C)C)C)C(C)C	QFFKZYTWXQBSBH-MAKNZWJESA-N	634.365	634.368	5.27011	1.0837	Na	5.2114
202	7-Hydroxykaurenolide	C20H28O3	316.204	C[C@@]12CCC[C@]3([C@@H]1[C@@H]([C@H]([C@@]45[C@@H]2CC[C@@H](C4)C(=C)C5)O)OC3=O)C	AHKUFTRUMQKIPH-TXRUPPPDSA-N	339.192	339.194	3.90625	1.53032	Na	1.64342
203	Aspochalasin J	C24H35NO4	401.257	C[C@H]1[C@H]2[C@@H](NC(=O)[C@@]23[C@@H](/C=C(/CCC[C@@H](/C=C/C(=O)O3)O)\C)C=C1C)CC(C)C	HXVGXVHKKDWYHZ-CEEOZWHRSA-N	419.291	419.291	0.0454716	1.92979	NH4	2.55162
204	Communesin B	C32H36N4O2	508.284	C/C=C/C=C/C(=O)N1CC[C@]23[C@H]1N4CC[C@]25[C@H](NC6=CC=CC=C36)N(C7=CC=CC(=C57)[C@H]4[C@@H]8C(O8)(C)C)C	XZFSMUXVAYCHFO-RPCCRITPSA-N	531.274	531.274	1.51399	1.17244	Na	3.07383
205	Fumifungin	C22H41NO7	431.288	CCCCCCC(CCCCCC/C=C/C(C(C(C(C(=O)O)N)O)OC(=O)C)O)O	OOEOVXMORBPOKC-NTCAYCPXSA-N	454.278	454.278	0.0618341	0.851821	Na	3.6378
206	Fumitremorgin B	C27H33N3O5	479.242	CC(=CCN1C2=C(C=CC(=C2)OC)C3=C1[C@@H](N4C(=O)[C@@H]5CCCN5C(=O)[C@@]4([C@H]3O)O)C=C(C)C)C	WEIYXEFMCIRZHC-MWGWWEMPSA-N	502.233	502.232	2.51074	1.29069	Na	1.66485
207	Nonactin	C40H64O12	736.44	C[C@@H]1C[C@H]2CC[C@H](O2)[C@@H](C(=O)O[C@H](C[C@@H]3CC[C@@H](O3)[C@H](C(=O)O[C@@H](C[C@H]4CC[C@H](O4)[C@@H](C(=O)O[C@H](C[C@@H]5CC[C@@H](O5)[C@H](C(=O)O1)C)C)C)C)C)C)C	RMIXHJPMNBXMBU-QIIXEHPYSA-N	754.474	754.474	0.330624	1.18584	NH4	13.8895
208	Mycophenolic acid IV	C22H28O6	388.189	CC1=C2COC(=O)C2=C(C(=C1OC)C/C=C(\C)/CC/C=C(\C)/CCC(=O)O)O	NEGCNVRPGPHOAR-CCLLZULESA-N	389.194	389.196	5.06645	1.0625	H	3.13807
209	Monactin	C41H66O12	750.455	CCC1CC2CCC(O2)C(C(=O)OC(CC3CCC(O3)C(C(=O)OC(CC4CCC(O4)C(C(=O)OC(CC5CCC(O5)C(C(=O)O1)C)C)C)C)C)C)C	YPUPRVWRYDPGCW-UHFFFAOYSA-N	773.448	773.445	3.50897	1.25316	Na	6.36202
210	Luteusin A	C19H23ClO4	350.128	CC[C@H](C)/C=C(\C)/C=C/C1=CC2=C(C(=O)[C@@]([C@@H](C2=CO1)O)(C)O)Cl	ZFOBGKZKFOAYTR-CZYMVTAPSA-N	368.163	368.163	0.119303	0.703779	NH4	2.2086
211	Ochrephilone	C23H26O5	382.178	CC[C@H](C)/C=C(\C)/C=C/C1=CC2=CC(=O)[C@]3([C@@H](C2=CO1)[C@@H](C(=O)O3)C(=O)C)C	GAIVGINVGXHEIA-ZAAJWPAISA-N	400.212	400.212	0.679291	1.54272	NH4	1.6722
212	Fusaproliferin	C27H40O5	444.288	C/C/1=C\CC/C(=C/C[C@]2([C@H](C/C=C(/[C@H](CC1)O)\C)C(=C(C2=O)O)[C@H](C)COC(=O)C)C)/C	VRGWBRLULZUWAJ-UEWDWXLZSA-N	467.277	467.277	1.47561	1.10677	Na	3.0884
213	Paspalitrem B	C32H39NO5	517.283	C[C@]12CC[C@]34C(=CC(=O)[C@H](O3)C(O4)(C)C)[C@@]1(CC[C@@H]5[C@@]2(C6=C(C5)C7=C(N6)C=CC(=C7)/C=C/C(C)(C)O)C)O	BZJWARDOYGJZHQ-GTJSZCKLSA-N	540.277	540.273	7.55763	1.34304	Na	1.95082
214	Cochlioquinone A	C30H44O8	532.304	CC[C@H](C)[C@H]([C@@H](C)C1=CC(=O)C2=C(C1=O)O[C@@]3(CC[C@@H]4[C@@]([C@H]3[C@@H]2O)(CC[C@@H](O4)C(C)(C)O)C)C)OC(=O)C	UWSYUCZPPVXEKW-MHUJPXPPSA-N	555.293	555.293	0.0196399	1.02056	Na	6.648
215	Bikaverin	C20H14O8	382.069	CC1=CC(=CC2=C1C(=O)C3=C(O2)C(=O)C4=C(C3=O)C(=CC(=C4O)OC)O)OC	QXNACSREWQXWCV-UHFFFAOYSA-N	383.075	383.077	3.92829	1.71425	H	1.10092
216	Fusarielin A	C25H38O4	402.277	C/C=C(\C)/[C@H]1[C@H]([C@@H]2C[C@H]3[C@](O3)(C[C@H]2[C@H]4[C@@]1(O4)C)C)/C=C/C=C(\C)/[C@H]([C@@H](C)CO)O	LRMWKBJDHOHUEZ-HCZQMODJSA-N	425.266	425.267	1.51419	1.35025	Na	2.0517
217	Mevastatin	C23H34O5	390.241	CC[C@H](C)C(=O)O[C@H]1CCC=C2[C@H]1[C@H]([C@H](C=C2)C)CC[C@@H]3C[C@H](CC(=O)O3)O	AJLFOPYRIVGYMJ-INTXDZFKSA-N	391.248	391.248	0.42669	0.703779	H	2.20147
218	Trichalasin B	C24H35NO4	401.257	C[C@H]1[C@H]2[C@@H](NC(=O)[C@@]23[C@@H](/C=C(/CC[C@H](C/C=C/C(=O)O3)O)\C)C=C1C)CC(C)C	NDJDZINMNBVVHS-CJQKOVSBSA-N	419.291	419.291	0.0454716	1.92979	NH4	2.55162
219	Yaequinolone J2	C27H31NO5	449.22	CC(=CCC[C@@]1(C=CC2=C(O1)C3=C(C=C2)NC(=O)[C@@H]([C@]3(C4=CC=C(C=C4)OC)O)OC)C)C	CPWPNTRWIIAFEG-WYMJOSIYSA-N	450.227	450.228	2.66999	1.88079	H	2.19472
220	Dinactin	C42H68O12	764.471	CCC1CC2CCC(O2)C(C(=O)OC(CC3CCC(O3)C(C(=O)OC(CC4CCC(O4)C(C(=O)OC(CC5CCC(O5)C(C(=O)O1)C)C)C)CC)C)C)C	ZBDGIMZKOJALMU-UHFFFAOYSA-N	782.504	782.505	1.66132	1.072	NH4	15.82
221	Rubrofusarin	C15H12O5	272.068	CC1=CC(=O)C2=C(C3=C(C=C(C=C3C=C2O1)OC)O)O	FPNKCZKRICBAKG-UHFFFAOYSA-N	273.076	273.076	0.0202431	0.696319	H	2.46605
222	Penitrem A	C37H44ClNO6	633.286	CC(=C)[C@@H]1[C@@H]([C@@H]2[C@@]3(O2)[C@@H](O1)CC[C@]4([C@]3(CC[C@@H]5[C@@]4(C6=C7[C@H]5OC([C@H]8C[C@H]9[C@@]8(C1=C7C(=CC(=C1CC9=C)Cl)N6)O)(C)C)C)O)C)O	JDUWHZOLEDOQSR-JKPSMKLGSA-N	656.273	656.276	3.56084	0.929698	Na	1.8793
223	Enniatin B2	C32H55N3O9	625.394	CC(C)[C@H]1C(=O)O[C@@H](C(=O)N([C@H](C(=O)O[C@@H](C(=O)N([C@H](C(=O)O[C@@H](C(=O)N1)C(C)C)C(C)C)C)C(C)C)C(C)C)C)C(C)C	NUFASKQIWTXKBR-LZNKSJHBSA-N	643.422	643.428	9.96416	1.82297	NH4	8.81397
224	Ascomycin	C43H69NO12	791.482	CC[C@@H]1/C=C(/C[C@@H](C[C@@H]([C@@H]2[C@H](C[C@H]([C@@](O2)(C(=O)C(=O)N3CCCC[C@H]3C(=O)O[C@@H]([C@@H]([C@H](CC1=O)O)C)/C(=C/[C@@H]4CC[C@H]([C@@H](C4)OC)O)/C)O)C)OC)OC)C)\C	ZDQSOHOQTUFQEM-NURRSENYSA-N	809.515	809.516	1.71888	-0.231373	NH4	11.7234
225	FK 506	C44H69NO12	803.482	C[C@@H]1C[C@@H]([C@@H]2[C@H](C[C@H]([C@@](O2)(C(=O)C(=O)N3CCCC[C@H]3C(=O)O[C@@H]([C@@H]([C@H](CC(=O)[C@@H](/C=C(/C1)\C)CC=C)O)C)/C(=C/[C@@H]4CC[C@H]([C@@H](C4)OC)O)/C)O)C)OC)OC	QJJXYPPXXYFBGM-LFZNUXCKSA-N	826.47	826.472	2.34196	1.10677	Na	3.16698
226	Paxillin	C27H33NO4	435.241	CC12CCC3C(=CC(=O)C(O3)C(C)(C)O)C1(CCC4C2(C5=C(C4)C6=CC=CC=C6N5)C)O	ACNHBCIZLNNLRS-UHFFFAOYSA-N	458.231	458.231	0.527783	1.34304	Na	1.99367
227	Enniatin B	C33H57N3O9	639.409	CC(C)[C@H]1C(=O)O[C@@H](C(=O)N([C@H](C(=O)O[C@@H](C(=O)N([C@H](C(=O)O[C@@H](C(=O)N1C)C(C)C)C(C)C)C)C(C)C)C(C)C)C)C(C)C	MIZMDSVSLSIMSC-VYLWARHZSA-N	657.443	657.444	0.451173	1.17182	NH4	11.3229
228	Radiclonic acid	C23H40O5	396.288	CCC(C)CC(C)CC(CC(C)/C=C(\C)/C=C(/CC(C)C(=O)O)\C(=O)O)CO	NNPPLRJHBQPBAQ-UKRBZAIKSA-N	397.295	397.295	0.0150537	1.31934	H	6.86893
229	Tenellin	C21H23NO5	369.158	CC[C@@H](C)/C=C(\C)/C=C/C(=O)C1=C(C(=CN(C1=O)O)C2=CC=C(C=C2)O)O	YELFBSBOFKWHSL-UCFWAISOSA-N	370.166	370.165	0.225653	0.820865	H	4.42485
230	Lolitrem N	C37H49NO7	619.351	C[C@]12CCC3C4([C@@]1(CC[C@@H]5[C@@]2(C6=C(C5)C7=C(N6)C=CC8=C7C[C@H]9[C@@H](C8=O)C(OC9(C)C)(C)C)C)O)C(O4)[C@@H](C(O3)C(C)(C)O)O	GIHSQRKLXKCZNX-LDGXNRGNSA-N	642.344	642.341	5.67228	-0.809033	Na	1.96868
231	Enniatin B1	C34H59N3O9	653.425	CC[C@H](C)[C@H]1C(=O)O[C@@H](C(=O)N([C@H](C(=O)O[C@@H](C(=O)N([C@H](C(=O)O[C@@H](C(=O)N1C)C(C)C)C(C)C)C)C(C)C)C(C)C)C)C(C)C	UQCSETXJXJTMKO-UMURLBKASA-N	671.459	671.459	0.381274	1.67759	NH4	9.4721
232	Beauvericin	C45H57N3O9	783.409	CC(C)[C@@H]1C(=O)N([C@H](C(=O)O[C@@H](C(=O)N([C@H](C(=O)O[C@@H](C(=O)N([C@H](C(=O)O1)CC2=CC=CC=C2)C)C(C)C)CC3=CC=CC=C3)C)C(C)C)CC4=CC=CC=C4)C	GYSCAQFHASJXRS-FFCOJMSVSA-N	806.403	806.399	4.72448	-2.75516	Na	1.96483
233	Fumitremorgin A	C32H41N3O7	579.294	CC(=CCO[C@H]1C2=C3[C@H](CC(OO[C@@H](N3C4=C2C=CC(=C4)OC)C=C(C)C)(C)C)N5[C@@]1(C(=O)N6CCC[C@H]6C5=O)O)C	ACGHJVZDNQZJOV-BMOJZYMJSA-N	580.302	580.302	0.0126881	1.13454	H	1.8909
234	Enniatin A1	C35H61N3O9	667.441	CC[C@H](C)[C@H]1C(=O)O[C@@H](C(=O)N([C@H](C(=O)O[C@@H](C(=O)N([C@H](C(=O)O[C@@H](C(=O)N1C)C(C)C)[C@@H](C)CC)C)C(C)C)C(C)C)C)C(C)C	OWUREPXBPJFMOK-CIRFPNLUSA-N	685.475	685.475	0.398496	1.20117	NH4	9.34263
235	Terpendole E	C28H39NO3	437.293	C[C@]12CC[C@H]3[C@]([C@@H]1CC[C@@H]4[C@@]2(C5=C(C4)C6=CC=CC=C6N5)C)([C@@H](C[C@H](O3)C(C)(C)O)O)C	SVYIMXYKHRBHSG-KYYKPQATSA-N	460.283	460.283	0.0210819	1.28123	Na	6.39777
236	Bafilomycin A1	C35H58O9	622.408	C[C@H]1C/C(=C/C=C/[C@@H]([C@H](OC(=O)/C(=C/C(=C/[C@H]([C@H]1O)C)/C)/OC)[C@@H](C)[C@H]([C@H](C)[C@]2(C[C@H]([C@@H]([C@H](O2)C(C)C)C)O)O)O)OC)/C	XDHNQDDQEHDUTM-JQWOJBOSSA-N	623.422	623.416	9.13986	0.264281	H	5.16835
237	Enniatin A	C36H63N3O9	681.456	CC[C@H](C)[C@H]1C(=O)O[C@@H](C(=O)N([C@H](C(=O)O[C@@H](C(=O)N([C@H](C(=O)O[C@@H](C(=O)N1C)C(C)C)[C@@H](C)CC)C)C(C)C)[C@@H](C)CC)C)C(C)C	TWHBYJSVDCWICV-BHZTXFQCSA-N	699.49	699.491	0.890205	1.01594	NH4	9.6718
238	Chevalone C	C28H40O5	456.288	CC1=CC(=O)C2=C(O1)O[C@]3(CC[C@@H]4[C@]5(CC[C@@H](C([C@@H]5CC[C@]4([C@@H]3C2)C)(C)C)OC(=O)C)C)C	ASOIHOGDYISNRH-GPTGPEQGSA-N	457.296	457.295	0.995827	1.91258	H	6.70458
239	Terpendole C	C32H41NO5	519.298	CC(=C[C@H]1O[C@H]2[C@@H]3[C@@]4(O3)[C@H](CC[C@]5([C@]4(CC[C@@H]6[C@@]5(C7=C(C6)C8=CC=CC=C8N7)C)O)C)O[C@@H]2C(O1)(C)C)C	WUOATFFODCBZBE-SCGIUCFSSA-N	520.307	520.306	1.1512	2.0073	H	4.24612
240	Siccanin	C22H30O3	342.219	CC1=CC(=C2[C@H]3[C@H]4[C@](CC[C@@H]5[C@]4(CCCC5(C)C)CO3)(OC2=C1)C)O	UGGAILYEBCSZIV-ITJSPEIASA-N	343.227	343.227	1.95994	0.0461224	H	8.17853
241	Cyclosporin B	C61H109N11O12	1187.83	C/C=C/C[C@@H](C)[C@H]([C@H]1C(=O)N[C@H](C(=O)N(CC(=O)N([C@H](C(=O)N[C@H](C(=O)N([C@H](C(=O)N[C@H](C(=O)N[C@@H](C(=O)N([C@H](C(=O)N([C@H](C(=O)N([C@H](C(=O)N1C)C(C)C)C)CC(C)C)C)CC(C)C)C)C)C)CC(C)C)C)C(C)C)CC(C)C)C)C)C)O	UCOQITKXMNKTKF-MXGZYYNMSA-N	1188.83	1188.83	0.0679276	2.19313	H	11.2661
242	Aflatrem	C32H39NO4	501.288	C[C@]12CC[C@]34C(=CC(=O)[C@H](O3)C(O4)(C)C)[C@@]1(CC[C@@H]5[C@@]2(C6=C(C5)C7=C(C=CC=C7N6)C(C)(C)C=C)C)O	YVDJBQQJIDPRKP-SLUQHKSNSA-N	524.277	524.278	0.553886	0.947241	Na	6.03308
243	Bassianolide	C48H84N4O12	908.609	CC(C)C[C@H]1C(=O)O[C@@H](C(=O)N([C@H](C(=O)O[C@@H](C(=O)N([C@H](C(=O)O[C@@H](C(=O)N([C@H](C(=O)O[C@@H](C(=O)N1C)C(C)C)CC(C)C)C)C(C)C)CC(C)C)C)C(C)C)CC(C)C)C)C(C)C	QVZZPLDJERFENQ-NKTUOASPSA-N	909.612	909.616	4.76125	0.80592	H	9.39315
244	Paspalitrem A	C32H39NO4	501.288	CC(=CCC1=CC2=C(C=C1)NC3=C2C[C@H]4[C@]3([C@]5(CC[C@]67C(=CC(=O)[C@H](O6)C(O7)(C)C)[C@@]5(CC4)O)C)C)C	WCISYVSWAOUFIY-TZHHUJIHSA-N	524.277	524.278	0.553886	0.947241	Na	6.03308
245	Antibiotic PF 1052	C26H39NO4	429.288	CCC(C)C1C(=O)C(=C(C2C(C=CC3C2C(CC(C3)C)C)C4(C(O4)C)C)O)C(=O)N1C	NPWKEUKXVOMELT-UHFFFAOYSA-N	452.278	452.278	0.192431	1.02056	Na	6.19798
246	Lolitrem B	C42H55NO7	685.398	CC(=C[C@H]1O[C@H]2[C@@H]3[C@@]4(O3)[C@H](CC[C@]5([C@]4(CC[C@@H]6[C@@]5(C7=C(C6)C8=C(N7)C=CC9=C8C[C@@H]3[C@@H](C9=O)C(OC3(C)C)(C)C)C)O)C)O[C@@H]2C(O1)(C)C)C	HGBZMCXKHKZYBF-WZGHVFPCSA-N	703.432	703.432	0.675946	-0.417779	NH4	10.5435
247	Nigericin	C40H68O11	724.476	C[C@H]1CC[C@@H](O[C@H]1[C@@H](C)C(=O)O)C[C@@H]2C[C@H]([C@H]([C@@]3(O2)[C@@H](C[C@@](O3)(C)[C@H]4CC[C@@](O4)(C)[C@H]5[C@H](C[C@@H](O5)[C@@H]6[C@H](C[C@H]([C@@](O6)(CO)O)C)C)C)C)C)OC	DANUORFCFTYTSZ-SJSJOXFOSA-N	747.465	747.466	1.10621	1.85044	Na	10.6516
248	Linamarin	C10H17NO6	247.106	CC(C)(C#N)O[C@H]1[C@@H]([C@H]([C@@H]([C@H](O1)CO)O)O)O	QLTCHMYAEJEXBT-ZEBDFXRSSA-N	248.114	248.113	1.21323	2.11364	H	1.00707
249	Amoxycillin	C16H19N3O5S	365.105	CC1([C@@H](N2[C@H](S1)[C@@H](C2=O)NC(=O)[C@@H](C3=CC=C(C=C3)O)N)C(=O)O)C	LSQZJLSUYDQPKJ-NJBDSQKTSA-N	366.109	366.112	8.53972	0.0493938	H	1.12232
250	Patulin	C7H6O4	154.027	C1C=C2C(=CC(=O)O2)C(O1)O	ZRWPUFFVAOMMNM-UHFFFAOYSA-N	155.035	155.034	0.682809	2.34348	H	2.4659
251	Lotaustralin	C11H19NO6	261.121	CC[C@](C)(C#N)O[C@H]1[C@@H]([C@H]([C@@H]([C@H](O1)CO)O)O)O	WEWBWVMTOYUPHH-QHAQEBJBSA-N	262.129	262.129	0.801058	0.901896	H	2.0324
252	Deoxynivalenol	C15H20O6	296.126	CC1=C[C@@H]2[C@]([C@@H](C1=O)O)([C@]3(C[C@H]([C@H]([C@@]34CO4)O2)O)C)CO	LINOMUASTDIRTM-QGRHZQQGSA-N	314.161	314.16	2.16134	2.00296	NH4	2.88747
253	Austdiol	C12H12O5	236.068	CC1=CC2=C(C(=O)[C@]([C@H](C2=CO1)O)(C)O)C=O	QVMUHZHZYCDMAI-RYUDHWBXSA-N	259.058	259.058	2.79188	1.25031	Na	3.76663
254	Fusarenon-X	C17H22O8	354.131	CC1=C[C@@H]2[C@]([C@@H](C1=O)O)([C@]3([C@@H]([C@H]([C@H]([C@@]34CO4)O2)O)OC(=O)C)C)CO	XGCUCFKWVIWWNW-CAYGJDLQSA-N	377.123	377.121	4.38115	-0.906997	Na	4.22473
255	Deepoxy-deoxynivalenol	C15H20O5	280.131	CC1=C[C@@H]2[C@]([C@@H](C1=O)O)([C@]3(C[C@H]([C@H](C3=C)O2)O)C)CO	ZACLXWTWERGCLX-MDUHGFIHSA-N	298.166	298.165	0.502025	1.54272	NH4	1.72218
256	Tetrahydrobostrycin	C16H20O8	340.116	C[C@@]1(C[C@H]2[C@H]([C@@H]([C@H]1O)O)C(=O)C3=C([C@@H]2O)C(=C(C=C3O)OC)O)O	BECCUNGYVJUQCO-BJVFMSSPSA-N	363.104	363.106	5.43046	0.683561	Na	2.4591
257	Ustusol A	C15H24O4	268.167	CC1=CC(=O)[C@@H]2[C@@]([C@]1(CO)O)(CC[C@@H](C2(C)C)O)C	YMOQABSTCGJNMC-NZBPQXDJSA-N	269.175	269.175	0.316867	1.54527	H	2.73723
258	Papyracillic acid A	C11H14O5	226.084	C[C@H]1C(=C)[C@]2(C(=CC(=O)O2)OC)O[C@@]1(C)O	UEYMIBGYKZFDMD-MQOMDTIOSA-N	227.092	227.092	0.582707	1.342	H	2.79442
259	Gibberellic acid	C19H22O6	346.142	C[C@@]12[C@H](C=C[C@@]3([C@@H]1[C@@H]([C@]45[C@H]3CC[C@](C4)(C(=C)C5)O)C(=O)O)OC2=O)O	IXORZMNAPKEEDV-OBDJNFEBSA-N	369.133	369.131	3.68089	0.166762	Na	6.6835
260	3-Acetyldeoxynivalenol	C17H22O7	338.137	CC1=C[C@@H]2[C@]([C@@H](C1=O)O)([C@]3(C[C@H]([C@H]([C@@]34CO4)O2)OC(=O)C)C)CO	ADFIQZBYNGPCGY-HTJQZXIKSA-N	339.143	339.144	4.91066	1.08084	H	2.37298
261	Neoxaline	C23H25N5O4	435.191	CC(C)(C=C)C12CC(C(=O)N\3C1(NC(=O)/C3=C\C4=CN=CN4)N(C5=CC=CC=C25)OC)O	HHLNXXASUKFCCX-LICLKQGHSA-N	458.18	458.18	0.50063	1.35696	Na	1.56513
262	HC Toxin	C21H32N4O6	436.232	C[C@@H]1C(=O)N[C@H](C(=O)N2CCC[C@@H]2C(=O)N[C@H](C(=O)N1)C)CCCCCC(=O)[C@@H]3CO3	GNYCTMYOHGBSBI-SVZOTFJBSA-N	459.223	459.222	2.73195	0.660773	Na	5.11128
263	Demethylsulochrin	C16H14O7	318.074	CC1=CC(=C(C(=C1)O)C(=O)C2=C(C=C(C=C2OC)O)C(=O)O)O	XMNMFMYKFRXRFH-UHFFFAOYSA-N	336.108	336.108	0.0415125	1.92913	NH4	1.0366
264	Agistatin E	C11H16O5	228.1	CC[C@@H]1CC[C@]2([C@]3([C@@H]1O[C@@H](O2)CC3=O)O)O	NJLUHFDDAQPMDI-GSLIMFEQSA-N	246.134	246.134	0.362372	0.971881	NH4	2.0945
265	Curvulin	C12H14O5	238.084	CCOC(=O)CC1=C(C(=CC(=C1)O)O)C(=O)C	TURXCFUGBPBPRS-UHFFFAOYSA-N	239.092	239.092	0.0501696	1.16899	H	5.56815
266	Oosporin	C14H10O8	306.038	CC1=C(C(=O)C(=C(C1=O)O)C2=C(C(=O)C(=C(C2=O)O)C)O)O	DHMPJEGFPQTNFX-UHFFFAOYSA-N	307.045	307.045	0.171842	0.402282	H	9.45728
267	Orsellinic acid	C8H8O4	168.042	CC1=CC(=CC(=C1C(=O)O)O)O	AMKYESDOVDKZKV-UHFFFAOYSA-N	186.077	186.077	0.0402829	1.25316	NH4	0.992667
268	Agistatin B	C11H18O4	214.121	CC[C@@H]1CC[C@H]2[C@]3([C@@H]1O[C@@H](O2)C[C@@H]3O)O	VPNRLNAIVJHRND-FSKPYACHSA-N	237.112	237.11	6.76915	1.37794	Na	19.8512
269	Violaceol II	C14H14O5	262.084	CC1=CC(=C(C(=C1)O)OC2=CC(=CC(=C2O)O)C)O	SXPZFHCIUAADLD-UHFFFAOYSA-N	285.075	285.074	5.4697	1.88644	Na	2.67305
270	Kipukasin D	C19H22N2O9	422.133	CC1=CC(=CC(=C1C(=O)O[C@@H]2[C@H](O[C@H]([C@@H]2O)N3C=CC(=O)NC3=O)CO)OC)OC	LQYPUZKOEZWGBX-BASLNEPJSA-N	445.122	445.122	0.391357	0.649568	Na	9.76313
271	Erythromycin	C37H67NO13	733.461	CC[C@@H]1[C@@]([C@@H]([C@H](C(=O)[C@@H](C[C@@]([C@@H]([C@H]([C@@H]([C@H](C(=O)O1)C)O[C@H]2C[C@@]([C@H]([C@@H](O2)C)O)(C)OC)C)O[C@H]3[C@@H]([C@H](C[C@H](O3)C)N(C)C)O)(C)O)C)C)O)(C)O	ULGZDMOVFRHVEP-RWJQBGPGSA-N	734.47	734.469	1.29758	2.03501	H	13.5611
272	Fellutanine A	C22H20N4O2	372.159	C1=CC=C2C(=C1)C(=CN2)C[C@@H]3C(=O)N[C@H](C(=O)N3)CC4=CNC5=CC=CC=C54	DNHODRZUCGXYKU-BGYRXZFFSA-N	373.166	373.166	0.066615	1.61143	H	4.23212
273	Violaceol I	C14H14O5	262.084	CC1=CC(=C(C(=C1)OC2=CC(=CC(=C2O)O)C)O)O	YRZXKRQRZJMBFT-UHFFFAOYSA-N	285.075	285.074	5.4697	1.88644	Na	2.67305
274	Pseurotin A	C22H25NO8	431.158	CC/C=C\[C@@H]([C@@H](C1=C(C(=O)[C@@]2(O1)[C@H]([C@@](NC2=O)(C(=O)C3=CC=CC=C3)OC)O)C)O)O	SLYDIPAXCVVRNY-UOWMTANKSA-N	454.148	454.148	0.0174395	0.973516	Na	2.47283
275	WIN 68577	C36H44N8O9	732.323	CC(C)[C@H]1C(=O)NCC(=O)N[C@H](C(=O)NCC(=O)N[C@H](C(=O)N2CCC[C@H]2C(=O)NCC(=O)N1)CC3=CNC4=CC=CC=C43)C(C5=CC=C(C=C5)O)O	SYBLQDYULNRQHI-ZTRORRTFSA-N	755.307	755.313	7.45583	1.11165	Na	2.20867
276	Dehydrocurvularin	C16H18O5	290.115	C[C@H]1CCC/C=C/C(=O)C2=C(CC(=O)O1)C=C(C=C2O)O	AVIRMQMUBGNCKS-RWCYGVJQSA-N	313.104	313.105	4.4025	1.43341	Na	1.00705
277	Fonsecin	C15H14O6	290.079	CC1(CC(=O)C2=C(C3=C(C=C(C=C3C=C2O1)O)OC)O)O	FKCYENFBFZUSDP-UHFFFAOYSA-N	313.07	313.069	4.53916	1.04354	Na	3.01607
278	Altenuene	C15H16O6	292.095	C[C@]12C[C@@H]([C@H](C=C1C3=C(C(=CC(=C3)OC)O)C(=O)O2)O)O	MMHTXEATDNFMMY-WBIUFABUSA-N	310.129	310.129	0.142175	1.40661	NH4	1.01412
279	Butyrolactone II	C19H16O7	356.09	COC(=O)[C@]1(C(=C(C(=O)O1)O)C2=CC=C(C=C2)O)CC3=CC=C(C=C3)O	AEKPZNDJHWFONI-LJQANCHMSA-N	374.127	374.124	9.13271	1.43725	NH4	2.57318
280	Altenusin	C15H14O6	290.079	CC1=CC(=C(C=C1C2=C(C(=CC(=C2)OC)O)C(=O)O)O)O	ADPBTBPPIIKLEH-UHFFFAOYSA-N	313.07	313.069	4.53916	1.04354	Na	3.01607
281	Tenuazonic acid	C10H15NO3	197.105	CCC(C)C1C(=C(C(=O)N1)C(=O)C)O	CEIZFXOZIQNICU-UHFFFAOYSA-N	220.096	220.095	3.67518	1.08538	Na	2.04457
282	Griseophenone C	C16H16O6	304.095	CC1=CC(=CC(=C1C(=O)C2=C(C=C(C=C2O)OC)O)OC)O	XZDCIORWACLZKX-UHFFFAOYSA-N	327.087	327.084	6.78363	1.10678	Na	3.4312
283	Terphenyllin	C20H18O5	338.115	COC1=C(C(=C(C(=C1)C2=CC=C(C=C2)O)OC)O)C3=CC=C(C=C3)O	YNEMPXKRLPZFAX-UHFFFAOYSA-N	356.15	356.15	0.00862372	1.10752	NH4	4.21758
284	Viridicatol	C15H11NO3	253.074	C1=CC=C2C(=C1)C(=C(C(=O)N2)O)C3=CC(=CC=C3)O	QIJIOTTYIGBOQA-UHFFFAOYSA-N	254.081	254.082	3.91536	0.659398	H	1.00692
285	Heptelidic acid	C15H20O5	280.131	CC(C)[C@H]1CC[C@@]2(CO2)[C@@H]3[C@@H]1C=C(COC3=O)C(=O)O	JESMSCGUTIEROV-RTWAVKEYSA-N	298.166	298.165	0.502025	1.54272	NH4	1.72218
286	Aspulvinone E	C17H12O5	296.068	C1=CC(=CC=C1/C=C\2/C(=C(C(=O)O2)C3=CC=C(C=C3)O)O)O	BNNVVTQUWNGKPH-ZROIWOOFSA-N	297.077	297.076	0.833666	-0.00807218	H	2.01498
287	Cycloechinulin	C20H21N3O3	351.158	C[C@H]1C(=O)N/2/C=C\C(C3=C(/C=C2/C(=O)N1)C4=C(N3)C=C(C=C4)OC)(C)C	RCTQPWJZZZLMBI-RPHUSYQJSA-N	352.165	352.166	2.34286	1.58419	H	4.51758
288	Austinol	C25H30O8	458.194	C[C@H]1[C@@]2(C(=O)O[C@]3([C@@H](C4=C([C@]5(CC[C@]4([C@@]2(C3=C)C(=O)O1)C)C=CC(=O)OC5(C)C)C)O)C)O	DNKFADXVMUNRRM-NYCRJNSTSA-N	459.201	459.202	2.75049	1.32099	H	2.77298
289	Gliocladic acid	C14H22O4	254.152	CC(C)[C@H]1CCC(=C[C@@H]1/C=C(\CO)/C(=O)O)CO	SLVSUVFUFJKMCV-URFGDBDFSA-N	255.159	255.16	1.90975	1.48576	H	4.89177
290	Curvularin	C16H20O5	292.131	C[C@H]1CCCCCC(=O)C2=C(CC(=O)O1)C=C(C=C2O)O	VDUIGYAPSXCJFC-JTQLQIEISA-N	315.122	315.121	3.57654	-0.783315	Na	1.01408
291	Glyantrypine	C20H16N4O2	344.127	C1C2=NC3=CC=CC=C3C(=O)N2C(C(=O)N1)CC4=CNC5=CC=CC=C54	YFNRNQBGKNOAPT-UHFFFAOYSA-N	345.136	345.135	2.48769	0.659398	H	1.00692
292	Fallacinol	C16H12O6	300.063	COC1=CC2=C(C(=C1)O)C(=O)C3=C(C2=O)C=C(C=C3O)CO	WJXSYUJKJSOJOG-UHFFFAOYSA-N	301.071	301.071	0.78026	1.57108	H	2.14458
293	Neoechinulin A	C19H21N3O2	323.163	C[C@H]1C(=O)N/C(=C\C2=C(NC3=CC=CC=C32)C(C)(C)C=C)/C(=O)N1	MYRPIYZIAHOECW-SAIXKJTDSA-N	346.154	346.153	2.87719	1.36228	Na	3.00848
294	Altertoxin-I	C20H16O6	352.095	C1C[C@]2([C@@H]3[C@H](CC(=O)C4=C(C=CC(=C34)C5=C2C(=C(C=C5)O)C1=O)O)O)O	GJIALGLHOBXNAT-KPOBHBOGSA-N	370.126	370.129	7.38571	0.735295	NH4	17.5994
295	Tentoxin	C22H30N4O4	414.227	C[C@H]1C(=O)N[C@H](C(=O)N(/C(=C\C2=CC=CC=C2)/C(=O)NCC(=O)N1C)C)CC(C)C	SIIRBDOFKDACOK-LFXZBHHUSA-N	437.217	437.217	1.66399	1.43011	Na	4.15335
296	Dihydrocitrinone	C13H14O6	266.079	C[C@@H]1[C@H](OC(=O)C2=C(C(=C(C(=C12)C)O)C(=O)O)O)C	VVVMDYGNIVXIIG-INEUFUBQSA-N	284.115	284.113	5.27963	1.40661	NH4	1.02127
297	Alteichin	C20H14O6	350.079	C1[C@@H]([C@@H]2C3=C(C=CC(=C3C1=O)O)C4=C5[C@]2(C=CC(=O)C5=C(C=C4)O)O)O	MTOHOIPTYJIUCH-KPOBHBOGSA-N	368.115	368.113	3.33114	0.751888	NH4	1.01425
298	Terretonin	C26H32O9	488.205	C[C@]12CCC(=O)C(C1=C(C(=O)[C@@]3([C@@]2(CC(=C)[C@]4([C@H]3C(=O)O[C@@](C4=O)(C)C(=O)OC)C)O)C)O)(C)C	CYHGEJACRPDZDP-IKNWHQMFSA-N	511.194	511.194	0.749753	1.98495	Na	3.00852
299	Dihydrochlamydocin	C28H40N4O6	528.295	C[C@H](C(=O)CCCCC[C@H]1C(=O)NC(C(=O)N[C@H](C(=O)N2CCC[C@@H]2C(=O)N1)CC3=CC=CC=C3)(C)C)O	UXOLDMJAFJDQSE-RYFAJOAYSA-N	529.303	529.303	0.0634582	2.0938	H	3.13792
300	Isokotanin B	C23H20O8	424.116	CC1=C(C(=CC2=C1C(=CC(=O)O2)OC)O)C3=C(C=C4C(=C3C)C(=CC(=O)O4)OC)OC	SFRGEKKETJXWMS-UHFFFAOYSA-N	425.124	425.124	0.21942	0.901896	H	2.53012
301	Tryptoquivaline G	C23H20N4O5	432.143	CC1(C(=O)N2[C@@H](N1O)[C@]3(C[C@@H](C(=O)O3)N4C=NC5=CC=CC=C5C4=O)C6=CC=CC=C62)C	NRWLZYIHXSJKCU-NYDSKATKSA-N	450.176	450.178	2.89535	1.71267	NH4	2.5801
302	Berkedrimane B	C22H33NO6	407.231	CC(C)[C@@H](C(=O)O[C@H]1CCC([C@H]2[C@]1([C@]3(COC(=O)C3=CC2)O)C)(C)C)NC(=O)C	DFGYGTWTXGTQIC-FIOCPMRGSA-N	425.265	425.265	0.0200799	1.85239	NH4	2.2658
303	beta-Zearalenol	C18H24O5	320.162	C[C@H]1CCC[C@H](CCC/C=C/C2=C(C(=CC(=C2)O)O)C(=O)O1)O	FPQFYIAXQDXNOR-PMRAARRBSA-N	343.151	343.152	3.74964	1.57025	Na	0.999817
304	Aspercolorin	C25H28N4O5	464.206	COC1=CC2=C(C=C1)NC(=O)C3CCCN3C(=O)CCNC(=O)C(NC2=O)CC4=CC=CC=C4	KABHYYPZHZXPIU-UHFFFAOYSA-N	487.196	487.196	1.03865	0.683561	Na	3.14557
305	Calyxanthone	C15H10O6	286.048	CC1=CC(=C2C(=C1)OC3=CC(=CC(=C3C2=O)C(=O)O)O)O	XSPSQSXYKJASKD-UHFFFAOYSA-N	304.079	304.082	9.77527	1.19086	NH4	3.77383
306	Cladosporin	C16H20O5	292.131	C[C@H]1CCC[C@@H](O1)C[C@H]2CC3=C(C(=CC(=C3)O)O)C(=O)O2	WOMKDMUZNBFXKG-ZWKOPEQDSA-N	315.122	315.121	3.57654	-0.783315	Na	1.01408
307	Phomalone	C13H18O5	254.115	CCCC(=O)C1=C(C=C(C(=C1O)CCO)O)OC	PTBQWWHUOMDVFS-UHFFFAOYSA-N	277.104	277.105	4.71771	1.57025	Na	0.992683
308	Alternariol	C14H10O5	258.053	CC1=CC(=CC2=C1C3=C(C(=CC(=C3)O)O)C(=O)O2)O	CEBXXEKPIIDJHL-UHFFFAOYSA-N	259.061	259.061	0.0508033	0.702875	H	1.7435
309	Quinadoline A	C27H27N5O4	485.206	CC(=C1C2=NC3=CC=CC=C3C(=O)N2C(C(=O)N1)CC4(C5NC(C(=O)N5C6=CC=CC=C64)(C)C)O)C	LCHQPVCRYDVSTJ-UHFFFAOYSA-N	486.214	486.214	0.106697	1.17996	H	1.71488
310	Penicillide	C21H24O6	372.157	CC1=CC2=C(C(=C1)O)OC3=C(C(=C(C=C3)[C@H](CC(C)C)O)OC)C(=O)OC2	UOWGLBYIKHMCIS-HNNXBMFYSA-N	373.165	373.165	0.817172	1.27394	H	4.23202
311	Fusarin C	C23H29NO7	431.194	C/C=C(\C=C(/C)\C=C(/C)\C=C\C=C(/C)\C(=O)[C@@]12[C@@H](O1)[C@](NC2=O)(CCO)O)/C(=O)OC	FZFYFSUIOSWLHW-UNZVFGKVSA-N	449.23	449.229	3.84807	1.77433	NH4	4.3463
312	Butyrolactone I	C24H24O7	424.152	CC(=CCC1=C(C=CC(=C1)CC2(C(=C(C(=O)O2)O)C3=CC=C(C=C3)O)C(=O)OC)O)C	NGOLMNWQNHWEKU-UHFFFAOYSA-N	442.186	442.187	0.0317034	1.07245	NH4	3.29537
313	Okaramine D	C33H34N4O6	582.248	CC1(/C=C\N2/C(=C\C3=C1NC4=CC=CC=C43)/C(=O)N5[C@]67[C@@H](C(N6C8=CC=CC=C8[C@@]7([C@@H]([C@@]5(C2=O)O)OC)O)(C)C)CO)C	VIKRIYAAOWJXCT-ZLMSUABPSA-N	583.256	583.256	0.00243235	1.89442	H	2.65183
314	Terrecyclic acid	C15H20O3	248.141	CC1(C[C@@]23[C@@H](CC[C@@H]1[C@H]2CC(=O)C3=C)C(=O)O)C	SMAWCSOVJJHIOI-JNIYBQFBSA-N	249.148	249.149	4.40194	1.46142	H	1.7509
315	Altertoxin II	C20H14O6	350.079	C1CC2(C3C4C(O4)C(=O)C5=C(C=CC(=C35)C6=C2C(=C(C=C6)O)C1=O)O)O	UBVHBTLDPUYTDO-UHFFFAOYSA-N	368.115	368.113	3.33114	0.751888	NH4	1.01425
316	Malformin A2	C22H37N5O5S2	515.224	CC(C)C[C@@H]1C(=O)N[C@H](C(=O)N[C@@H]2CSSC[C@H](C(=O)N[C@H](C(=O)N1)C(C)C)NC2=O)C(C)C	KRQRRZFXHYYNSO-MTSZKFMLSA-N	538.213	538.213	0.183512	1.02075	Na	3.32387
317	Citreorosein	C15H10O6	286.048	C1=C(C=C(C2=C1C(=O)C3=C(C2=O)C(=CC(=C3)O)O)O)CO	YQHZABGPIPECSQ-UHFFFAOYSA-N	304.079	304.082	9.77527	1.19086	NH4	3.77383
318	Andrastin B	C28H40O7	488.277	CC1=C[C@@H]2[C@](CC[C@H]3[C@]2(CC[C@@H](C3(C)C)OC(=O)C)CO)([C@]4([C@@]1(C(=C(C4=O)C)O)C)C(=O)OC)C	DZXRNRBENGRMTG-OXILWVMOSA-N	489.286	489.285	2.07856	1.04119	H	4.7174
319	Citrinin	C13H14O5	250.084	C[C@@H]1[C@H](OC=C2C1=C(C(=C(C2=O)C(=O)O)O)C)C	CBGDIJWINPWWJW-IYSWYEEDSA-N	273.076	273.074	6.13295	1.27086	Na	1.97938
320	alpha-Zearalenol	C18H24O5	320.162	C[C@H]1CCC[C@@H](CCC/C=C/C2=C(C(=CC(=C2)O)O)C(=O)O1)O	FPQFYIAXQDXNOR-QDKLYSGJSA-N	343.151	343.152	3.74964	1.57025	Na	0.999817
321	Isochromophilone VI	C23H28ClNO5	433.166	CC[C@H](C)/C=C(\C)/C=C/C1=CC2=C(C(=O)[C@](C(=O)C2=CN1CCO)(C)OC(=O)C)Cl	ZQLIAKJHIRHCFA-XIIQHIPDSA-N	434.171	434.173	6.17819	1.2711	H	2.71582
322	Pinselin	C16H12O6	300.063	CC1=CC(=C2C(=C1)OC3=C(C2=O)C(=C(C=C3)O)C(=O)OC)O	TWQNCGDOHUNFFU-UHFFFAOYSA-N	301.071	301.071	0.78026	1.57108	H	2.14458
323	Zearalenone	C18H22O5	318.147	C[C@H]1CCCC(=O)CCC/C=C/C2=C(C(=CC(=C2)O)O)C(=O)O1	MBMQEIFVQACCCH-QBODLPLBSA-N	336.181	336.181	1.44911	-1.1649	NH4	8.51188
324	Sydonic acid	C15H22O4	266.152	CC(C)CCCC(C)(C1=C(C=C(C=C1)C(=O)O)O)O	VZXPWVDKXCYHSI-UHFFFAOYSA-N	267.16	267.16	2.32849	1.35961	H	2.25863
325	Unguinol	C19H18O5	326.115	C/C=C(\C)/C1=CC(=C(C2=C1OC3=C(C(=CC(=C3)O)C)C(=O)O2)C)O	ZPPIKBUIYSSQEH-WEVVVXLNSA-N	327.121	327.123	5.74519	1.94892	H	1.00728
326	Norlichexanthone	C14H10O5	258.053	CC1=CC(=CC2=C1C(=O)C3=C(C=C(C=C3O2)O)O)O	AQZHBCDRWFMXIN-UHFFFAOYSA-N	259.061	259.061	0.0508033	0.702875	H	1.7435
327	Trichotetronine	C28H32O8	496.21	C/C=C/C=C/C(=O)[C@@H]1[C@H]([C@H]2C(=C(/C=C/C=C/C)O)C(=O)[C@@]1(C(=O)[C@@]2(C)O)C)[C@@]3(C(=C(C(=O)O3)C)O)C	POOKHYNGUAZJAE-XJZPPUTOSA-N	514.245	514.244	1.39856	1.63925	NH4	1.865
328	Rugulosin	C30H22O10	542.121	CC1=CC2=C(C(=C1)O)C(=C3C(=O)C4C(C5C3(C2=O)C6C(C5C47C(=C(C8=C(C7=O)C=C(C=C8O)C)O)C6=O)O)O)O	QFDPVUTXKUGISP-UHFFFAOYSA-N	543.131	543.129	3.18296	2.02196	H	1.10803
329	Amphotericin	C47H73NO17	923.488	C[C@H]1/C=C/C=C/C=C/C=C/C=C/C=C/C=C/[C@@H](C[C@H]2[C@@H]([C@H](C[C@](O2)(C[C@H](C[C@H]([C@@H](CC[C@H](C[C@H](CC(=O)O[C@H]([C@@H]([C@@H]1O)C)C)O)O)O)O)O)O)O)C(=O)O)O[C@H]3[C@H]([C@H]([C@@H]([C@H](O3)C)O)N)O	APKFDSVGJQXUKY-INPOYWNPSA-N	946.478	946.478	0.511078	1.80256	Na	1.92212
330	Geldanamycin	C29H40N2O9	560.273	C[C@H]1C[C@@H]([C@@H]([C@H](/C=C(/[C@@H]([C@H](/C=C\C=C(\C(=O)NC2=CC(=O)C(=C(C1)C2=O)OC)/C)OC)OC(=O)N)\C)C)O)OC	QTQAWLPCGQOSGP-KSRBKZBZSA-N	583.265	583.263	3.35145	-1.22712	Na	2.1301
331	Sch 725680	C21H22O7	386.137	C/C=C/C1=CC2=CC(=O)[C@@]([C@H]([C@@H]2CO1)OC(=O)C3=C(C=C(C=C3C)O)O)(C)O	HNVJWWBKFFDQAA-DAYKGMGPSA-N	387.145	387.144	1.56239	1.73442	H	2.0732
332	Okaramine B	C33H34N4O5	566.253	C[C@H]1[C@@]23[C@@]([C@@H]([C@]4(N2C(=O)/C/5=C/C6=C(C(/C=C\N5C4=O)(C)C)NC7=CC=CC=C76)O)OC)(C8=CC=CC=C8N3C1(C)C)O	PNJDFZNVNWQTFD-KTJJPEJQSA-N	584.285	584.287	2.9705	1.77408	NH4	3.98807
333	Rubellin D	C30H22O10	542.121	CC1=CC2=C(C(=C1)O)C(=O)O[C@@H]2[C@]34CC5=CC(=C6C(=C5[C@H]3C=C[C@H]([C@H]4O)O)C(=O)C7=C(C=CC(=C7C6=O)O)O)O	PPESFXQGSSHUFR-WVZQVMSVSA-N	543.131	543.129	3.18296	2.02196	H	1.10803
334	Siccanol	C25H38O4	402.277	C/C/1=C\CC/C(=C/C[C@]2([C@H](C/C=C(/[C@H](CC1)O)\C)C(=C(C2=O)O)[C@H](C)CO)C)/C	UTGBBPSEQPITLF-IXRUDUFRSA-N	425.266	425.267	1.51419	1.35025	Na	2.0517
335	Penigequinolone A	C27H33NO6	467.231	C[C@]1(CCC(CO1)(C)C)/C=C/C2=C(C3=C(C=C2)NC(=O)[C@@H]([C@]3(C4=CC=C(C=C4)OC)O)OC)O	CVWJKBJRSZXDIW-WIAMJCSFSA-N	490.221	490.221	0.475714	1.02056	Na	4.06067
336	Sphingofungin D	C22H41NO7	431.288	CCCCCC[C@H](CCCCCC/C=C/[C@@H]([C@H]([C@@H]([C@@H](C(=O)O)NC(=O)C)O)O)O)O	VKFZVQCKAPPEFZ-RXCFHPIVSA-N	454.278	454.278	0.0618341	0.851821	Na	3.6378
337	Asperphenamate	C32H30N2O4	506.221	C1=CC=C(C=C1)C[C@@H](COC(=O)[C@H](CC2=CC=CC=C2)NC(=O)C3=CC=CC=C3)NC(=O)C4=CC=CC=C4	CVULDJMCSSACEO-VMPREFPWSA-N	507.229	507.228	0.686621	1.65247	H	4.18187
338	Apicidin	C34H49N5O6	623.368	CC[C@H](C)[C@H]1C(=O)N2CCCC[C@@H]2C(=O)N[C@H](C(=O)N[C@H](C(=O)N1)CC3=CN(C4=CC=CC=C43)OC)CCCCCC(=O)CC	JWOGUUIOCYMBPV-GMFLJSBRSA-N	646.358	646.358	0.245455	-0.84184	Na	5.59
339	KO 143	C26H35N3O5	469.258	CC(C)C[C@H]1C2=C(C[C@@H]3N1C(=O)[C@@H](NC3=O)CCC(=O)OC(C)(C)C)C4=C(N2)C=C(C=C4)OC	NXNRAECHCJZNRF-JBACZVJFSA-N	487.292	487.292	0.277273	1.34834	NH4	4.39583
340	Andrastin A	C28H38O7	486.262	CC1C(=O)[C@@]2(C(=C[C@@H]3[C@@]([C@@]2(C1=O)C(=O)OC)(CC[C@H]4[C@]3(CC[C@@H](C4(C)C)OC(=O)C)C=O)C)C)C	GRBXNADBNJGZRK-GJEDHNSHSA-N	487.27	487.27	0.0384563	2.03664	H	4.4253
341	Helvolic acid	C33H44O8	568.304	C[C@H]1[C@@H]2[C@@H](C(=O)[C@]3([C@H]([C@]2(C=CC1=O)C)CC[C@@H]\4[C@@]3(C[C@@H](/C4=C(/CCC=C(C)C)\C(=O)O)OC(=O)C)C)C)OC(=O)C	MDFZYGLOIJNNRM-OAJDADRGSA-N	591.293	591.293	0.0568714	1.34523	Na	3.8169
342	Emericellamide C	C30H53N5O7	595.394	CCCCCCC[C@@H]1[C@H](C(=O)NCC(=O)N[C@H](C(=O)N[C@H](C(=O)N[C@H](C(=O)N[C@H](C(=O)O1)C)C)CC(C)C)C(C)C)C	UUMZIOKIWJGBCS-IDRTZAGBSA-N	618.384	618.384	0.040904	1.54446	Na	4.93172
343	Nidurufin	C20H16O8	384.085	C[C@]12CC[C@@H]([C@H](O1)C3=C(O2)C=C4C(=C3O)C(=O)C5=C(C4=O)C=C(C=C5O)O)O	JJXUKZWOMSARJK-UUADDVKTSA-N	385.092	385.092	0.754531	-1.18586	H	3.33433
344	Ophiobolin B	C25H38O4	402.277	C[C@@H](CCC=C(C)C)[C@]1(CC[C@]2([C@H]1C/C=C(\[C@@H]3[C@H](C2)[C@](CC3=O)(C)O)/C=O)C)O	SXRLPRKYTRWOES-PCQMDVLKSA-N	425.266	425.267	1.51419	1.35025	Na	2.0517
345	Trichodimerol	C28H32O8	496.21	C/C=C/C=C/C(=C\1/C(=O)[C@@]2([C@]3(O[C@]4([C@@H]2/C(=C(/O)\C=C\C=C\C)/C(=O)[C@@]5([C@]4(O[C@]3([C@H]15)C)O)C)C)O)C)/O	OFOUJHGWJJEVMF-SZJYFORJSA-N	514.245	514.244	1.39856	1.63925	NH4	1.865
346	Emericellamide A	C31H55N5O7	609.41	CCCCCC[C@H](C)[C@@H]1[C@H](C(=O)NCC(=O)N[C@H](C(=O)N[C@H](C(=O)N[C@H](C(=O)N[C@H](C(=O)O1)C)C)CC(C)C)C(C)C)C	QURRTAYEASAREY-OOVPVTRWSA-N	632.4	632.4	0.270848	1.38921	Na	5.1828
347	Andrastin D	C26H36O5	428.256	CC1=C[C@H]2[C@@]3(CCC(=O)C([C@H]3CC[C@@]2([C@]4([C@@]1(C(=C(C4=O)C)O)C)C(=O)OC)C)(C)C)C	SMUNNMAWNRFDPB-UWWAQUNASA-N	451.246	451.246	0.07175	1.30259	Na	2.35858
348	Macrosporin	C16H12O5	284.068	CC1=CC2=C(C=C1O)C(=O)C3=C(C2=O)C=C(C=C3O)OC	FKTPLNFTYJEAAB-UHFFFAOYSA-N	285.076	285.076	0.00525051	1.40001	H	3.30963
349	Versicolorin A	C18H10O7	338.043	C1=CO[C@H]2[C@@H]1C3=C(O2)C=C4C(=C3O)C(=O)C5=C(C4=O)C=C(C=C5O)O	SJNDYXPJRUTLNW-ULCDLSAGSA-N	356.076	356.077	1.33388	0.929698	NH4	1.02143
350	Cylindrol B	C23H30O4	370.214	C[C@@H]1CCC(=O)[C@@H]([C@@]1(C)/C=C/C(=C/CC2=C(C=C(C(=C2O)C=O)C)O)/C)C	AQCKKGIVKOHRLM-HBFAXEOFSA-N	393.203	393.204	1.94728	0.977471	Na	2.03227
351	Chloronectrin	C25H33ClO6	464.197	CC1CCC(=O)C(C1(C)CC(/C(=C/CC2=C(C(=C(C(=C2O)Cl)C)C=O)O)/C)OC(=O)C)C	JIHNIFVHUVCKQA-NTUHNPAUSA-N	482.233	482.231	4.24861	1.86833	NH4	1.87953
352	Rapamycin	C51H79NO13	913.555	C[C@@H]1CC[C@H]2C[C@@H](/C(=C/C=C/C=C/[C@H](C[C@H](C(=O)[C@@H]([C@@H](/C(=C/[C@H](C(=O)C[C@H](OC(=O)[C@@H]3CCCCN3C(=O)C(=O)[C@@]1(O2)O)[C@H](C)C[C@@H]4CC[C@H]([C@@H](C4)OC)O)C)/C)O)OC)C)C)/C)OC	QFJCIRLUMZQUOT-HPLJOQBZSA-N	931.581	931.589	8.80155	1.99174	NH4	14.2969
353	Emodin	C15H10O5	270.053	CC1=CC2=C(C(=C1)O)C(=O)C3=C(C2=O)C=C(C=C3O)O	RHMXXJGYXNZAPX-UHFFFAOYSA-N	288.087	288.087	0.0170196	0.441649	NH4	2.46585
354	Thielavin B	C31H34O10	566.215	CC1=CC(=C(C(=C1C(=O)OC2=C(C(=C(C(=C2C)C)C(=O)OC3=C(C(=C(C(=C3C)C)C(=O)O)OC)C)OC)C)O)C)O	UULGWGARYDGVBM-UHFFFAOYSA-N	584.249	584.249	0.00165854	1.75633	NH4	3.27418
355	Oligomycin B	C45H72O12	804.502	CC[C@H]\1CC[C@@H]2[C@@H]([C@@H]([C@H]([C@@]3(O2)C(=O)C[C@H]([C@H](O3)C[C@H](C)O)C)C)OC(=O)/C=C/[C@H]([C@@H]([C@H](C(=O)[C@H]([C@@H]([C@H](C(=O)[C@@]([C@@H]([C@H](C/C=C/C=C1)C)O)(C)O)C)O)C)C)O)C)C	QPRQJOHKNJIMGN-UXAQBZNTSA-N	822.536	822.537	0.918287	-1.44703	NH4	12.8354
356	Emericellamide E	C32H57N5O7	623.426	CCCCCCCCC[C@@H]1[C@H](C(=O)NCC(=O)N[C@H](C(=O)N[C@H](C(=O)N[C@H](C(=O)N[C@H](C(=O)O1)C)C)CC(C)C)C(C)C)C	QMLMSNGIBMIZIY-UTFDQXCASA-N	646.416	646.416	0.142265	1.18822	Na	5.7327
357	Ascofuranone	C23H29ClO5	420.17	CC1=C(C(=C(C(=C1Cl)O)C/C=C(\C)/CC/C=C(\C)/[C@@H]2CC(=O)C(O2)(C)C)O)C=O	VGYPZLGWVQQOST-JUERRSSISA-N	438.204	438.205	1.30472	1.56279	NH4	3.67375
358	Chrysophanol	C15H10O4	254.058	CC1=CC2=C(C(=C1)O)C(=O)C3=C(C2=O)C=CC=C3O	LQGUBLBATBMXHT-UHFFFAOYSA-N	255.066	255.066	0.375882	1.42903	H	2.46593
359	Ilicicolin E	C23H27ClO4	402.16	C[C@@H]1C=CC(=O)[C@@H]([C@@]1(C)/C=C/C(=C/CC2=C(C(=C(C(=C2O)Cl)C)C=O)O)/C)C	ZLAQYJKDQSZARB-FLDGXQSCSA-N	420.196	420.194	4.34032	1.02056	NH4	4.14635
360	Oligomycin A	C45H74O11	790.523	CC[C@H]\1CC[C@@H]2[C@@H]([C@@H]([C@H]([C@@]3(O2)CC[C@H]([C@H](O3)C[C@H](C)O)C)C)OC(=O)/C=C/[C@H]([C@@H]([C@H](C(=O)[C@H]([C@@H]([C@H](C(=O)[C@@]([C@@H]([C@H](C/C=C/C=C1)C)O)(C)O)C)O)C)C)O)C)C	MNULEGDCPYONBU-WMBHJXFZSA-N	813.513	813.513	0.0967603	0.741521	Na	13.6324
361	Andrastin C	C28H40O6	472.282	CC1=C[C@H]2[C@@]3(CC[C@@H](C([C@H]3CC[C@@]2([C@]4([C@@]1(C(=C(C4=O)C)O)C)C(=O)OC)C)(C)C)OC(=O)C)C	AWMJEDMVXAOTQZ-QUQNHZJXSA-N	495.273	495.272	1.83623	1.20849	Na	3.28795
362	Equisetin	C22H31NO4	373.225	C/C=C/[C@@H]1C=C[C@@H]2C[C@@H](CC[C@H]2[C@]1(C)/C(=C\3/C(=O)[C@@H](N(C3=O)C)CO)/O)C	QNQBPPQLRODXET-AIMHRHHOSA-N	391.26	391.26	0.0452364	1.38445	NH4	2.05173
363	Ilicicolin C	C23H31ClO4	406.191	C[C@@H]1CCC(=O)[C@@H]([C@@]1(C)CC/C(=C/CC2=C(C(=C(C(=C2O)Cl)C)C=O)O)/C)C	IJEHYEVNWOYGMS-WGUBEYSISA-N	424.225	424.225	1.5475	-0.613412	NH4	4.139
364	Usnic acid	C18H16O7	344.09	CC1=C(C(=C2C(=C1O)C3(C(=CC(=O)C(C3=O)C(=O)C)O2)C)C(=O)C)O	CUCUKLJLRRAKFN-UHFFFAOYSA-N	367.079	367.079	0.0251771	1.3706	Na	2.68022
365	Ascochlorin	C23H29ClO4	404.175	C[C@@H]1CCC(=O)[C@@H]([C@@]1(C)/C=C/C(=C/CC2=C(C(=C(C(=C2O)Cl)C)C=O)O)/C)C	SETVRSKZJJWOPA-FLDGXQSCSA-N	422.21	422.21	1.21757	1.30241	NH4	3.10273
366	Cochliodinol	C32H30N2O4	506.221	CC(=CCC1=CC2=C(C=C1)NC=C2C3=C(C(=O)C(=C(C3=O)O)C4=CNC5=C4C=C(C=C5)CC=C(C)C)O)C	ZXRULNXZJSCTQQ-UHFFFAOYSA-N	507.229	507.228	0.686621	1.65247	H	4.18187
367	Fusidic acid	C31H48O6	516.345	C[C@H]1[C@@H]2CC[C@]3([C@H]([C@]2(CC[C@H]1O)C)[C@@H](C[C@@H]\4[C@@]3(C[C@@H](/C4=C(/CCC=C(C)C)\C(=O)O)OC(=O)C)C)O)C	IECPWNUMDGFDKC-MZJAQBGESA-N	539.337	539.335	3.35079	1.40719	Na	2.24438
368	Averantin	C20H20O7	372.121	CCCCC[C@@H](C1=C(C=C2C(=C1O)C(=O)C3=C(C2=O)C=C(C=C3O)O)O)O	WGPOPPKSQRZUTP-LBPRGKRZSA-N	373.129	373.129	1.92596	2.58634	H	2.58747
369	Methylequisetin	C23H33NO4	387.241	C/C=C/[C@H]1C(=C[C@H]2C[C@@H](CC[C@@H]2[C@@]1(C)/C(=C\3/C(=O)[C@@H](N(C3=O)C)CO)/O)C)C	ZTPMRDYXXHRMRU-VCBFZIKFSA-N	405.277	405.275	5.18148	0.953343	NH4	2.28743
370	Integracin B	C35H54O7	586.387	CCC[C@H](CCCCCCCC1=C(C(=CC(=C1)O)O)C(=O)O[C@H](CCC)CCCCCCCC2=CC(=CC(=C2)O)O)O	IKNYNBVDLOWJFN-AKGWNBJDSA-N	604.417	604.421	6.61944	1.10024	NH4	9.5144
371	Altersetin	C24H33NO4	399.241	C/C=C/C=C/C1C=CC2CC(CCC2C1(C)/C(=C/3\C(=O)C(NC3=O)C(C)O)/O)C	AIFXMSDWXBFQTF-SNXGECCISA-N	417.275	417.275	0.230549	1.42903	NH4	2.43023
372	Ionomycin	C41H72O9	708.518	C[C@H](CCC(=O)O)C[C@H](C)C[C@H](C)C(=O)/C=C(/[C@H](C)C[C@H](C)C/C=C/[C@@H](C)[C@H]([C@@H](C)[C@H](C[C@@H]1CC[C@@](O1)(C)[C@H]2CC[C@@](O2)(C)[C@@H](C)O)O)O)\O	PGHMRUGBZOYCAA-ADZNBVRBSA-N	731.506	731.507	1.30378	1.93239	Na	9.66437
373	Physcion	C16H12O5	284.068	CC1=CC2=C(C(=C1)O)C(=O)C3=C(C2=O)C=C(C=C3O)OC	FFWOKTFYGVYKIR-UHFFFAOYSA-N	285.076	285.076	0.00525051	1.40001	H	3.30963
374	Flavoglaucin	C19H28O3	304.204	CCCCCCCC1=C(C=C(C(=C1C=O)O)CC=C(C)C)O	RGRXZGKXEJHPQQ-UHFFFAOYSA-N	327.194	327.194	0.413416	1.04335	Na	1.65082
375	Integracin A	C37H56O8	628.398	CCCC(CCCCCCCC1=C(C(=CC(=C1)O)O)C(=O)OC(CCC)CCCCCCCC2=CC(=CC(=C2)O)O)OC(=O)C	LCCCZIASPPCLCU-UHFFFAOYSA-N	629.405	629.405	0.821187	1.24804	H	8.24238
376	A 23187	C29H37N3O6	523.268	C[C@H]1CCC2([C@@H](C[C@H]([C@H](O2)C(C)C(=O)C3=CC=CN3)C)C)O[C@H]1CC4=NC5=C(O4)C=CC(=C5C(=O)O)NC	HIYAVKIYRIFSCZ-CVXKHCKVSA-N	524.277	524.276	2.6368	0.947241	H	6.03308
377	Averufin	C20H16O7	368.09	C[C@]12CCC[C@H](O1)C3=C(O2)C=C4C(=C3O)C(=O)C5=C(C4=O)C=C(C=C5O)O	RYFFZJHGQCKWMV-YUNKPMOVSA-N	369.097	369.097	0.0454764	1.23667	H	3.35267
378	Ilicicolin B	C23H32O3	356.235	CC1=CC(=C(C(=C1C=O)O)C/C=C(\C)/CC/C=C(\C)/CCC=C(C)C)O	QAPOXOGEDXIOHD-VZRGJMDUSA-N	374.269	374.269	1.76404	2.06581	NH4	5.86817
379	Ilicicolin A	C23H31ClO3	390.196	CC1=C(C(=C(C(=C1Cl)O)C/C=C(\C)/CC/C=C(\C)/CCC=C(C)C)O)C=O	MHWOMRMBQGSTFS-JTCWOHKRSA-N	408.23	408.23	0.0560685	1.57119	NH4	5.09693
